## **Molecular mechanisms of fentanyl mediated $\beta$ -arrestin biased signaling**

Parker W. de Waal<sup>1,4</sup>, Jingjing Shi<sup>2</sup>, Erli You<sup>2</sup>, Xiaoxi Wang<sup>2</sup>, Karsten Melcher<sup>1</sup>, Yi Jiang<sup>2,\*</sup>, H. Eric Xu<sup>1,2,\*</sup>,  
Bradley M. Dickson<sup>1,\*</sup>

<sup>1</sup>Center for Cancer and Cell Biology, Innovation and Integration Program, Van Andel Research Institute, Grand Rapids, MI 49503, USA

<sup>2</sup>The CAS Key Laboratory of Receptor Research, Shanghai Institute of Materia Medica, Chinese Academy of Sciences, Shanghai 201203, China.

<sup>3</sup>Center for Epigenetics, Van Andel Research Institute, Grand Rapids, Michigan 49503, United States.

<sup>4</sup>Current address: D. E. Shaw Research, New York, NY 10036

\* To whom correspondence should be addressed: [bradley.dickson@vai.org](mailto:bradley.dickson@vai.org) (B.M.D.); [eric.xu@vai.org](mailto:eric.xu@vai.org) (H.E.X.); [yjiang@sim.ac.cn](mailto:yjiang@sim.ac.cn) (Y.J.).

## Abstract

The development of novel analgesics with improved safety profiles to combat the opioid epidemic represents a central question to G protein coupled receptor structural biology and pharmacology: What chemical features dictate G protein or  $\beta$ -arrestin signaling? Here we use adaptively biased molecular dynamics simulations to determine how fentanyl, a potent  $\beta$ -arrestin biased agonist, activates the  $\mu$ -opioid receptor ( $\mu$ OR). The resulting fentanyl-bound pose provides rational insight into a wealth of historical structure-activity-relationship on its chemical scaffold. We found that fentanyl and the synthetic opioid peptide DAMGO require M153 to induce  $\beta$ -arrestin coupling, while M153 was dispensable for G protein coupling. We propose and validate a mechanism where the n-aniline ring of fentanyl mediates  $\mu$ OR  $\beta$ -arrestin through a novel M153 “microswitch” by synthesizing fentanyl-based derivatives that exhibit complete, clinically desirable, G protein biased coupling. Together, these results provide molecular insight into fentanyl mediated  $\beta$ -arrestin biased signaling and a rational framework for further optimization of fentanyl-based analgesics with improved safety profiles.

## Author Summary

The global opioid crisis has drawn significant attention to the risks associated with over-use of synthetic opioids. Despite the public attention, and perhaps in-line with the profit-based incentives of the pharmaceutical industry, there is no public structure of  $\mu$ -opioid receptor bound to fentanyl or fentanyl derivatives. A publicly available structure of the complex would allow open-source development of safer painkillers and synthetic antagonists. Current overdose antidotes, antagonists, require natural products in their synthesis which persists a sizable barrier to market and develop better antidotes. In this work we use advance molecular dynamics techniques to obtain the bound geometry of  $\mu$ -opioid receptor with fentanyl (and derivatives). Based on our in-silico structure, we synthesized and tested novel compounds to validate our predicted structure. Herein we report the bound state of several dangerous fentanyl derivatives and introduce new derivatives with signaling profiles that may lead to lower risk of respiratory depression.

## Introduction

Activation of the  $\mu$ -opioid receptor ( $\mu$ OR), a class A G protein coupled receptor (GPCR), by opiates leads to clinically desired antinociceptive properties [1], but also presents many unwanted on-target effects including addiction and potentially fatal respiratory depression. Opiates represent the largest class of prescribed drugs for the management of severe pain [2], and their subsequent abuse has led to the fastest growing public health epidemic in United States history with the Centers for Disease Control reporting a ten-fold increase in lethal overdoses from 2013 to 2017 [3]. Driven primarily by fentanyl, a highly potent and easily synthesized synthetic opiate [4], the unprecedented rate of opioid overdoses has prompted intensive research on the development of novel analgesics without the risks of standard opiates [5].

Fentanyl, and more commonly prescribed opiate alkaloids such as oxycodone, stimulate desirable antinociceptive activity by interacting with the  $\mu$ OR's orthosteric ligand binding site. Ligand bound  $\mu$ OR, in turn, mediates heterotrimeric Gi/o complex signaling to inhibit cyclic adenosine monophosphate (cAMP) production [6]. Activated  $\mu$ OR can also couple to  $\beta$ -arrestins through phosphorylation events on their C-terminal tail to promote both receptor internalization and desensitization [7]. This  $\beta$ -arrestin signaling axis has been hypothesized as the source for many unwanted opiate-induced side-effects as  $\beta$ -arrestin knock-out mice exhibit prolonged morphine induced analgesia, protection against respiratory depression, opiate dependence and tolerance, and constipation [8-11]. These studies suggest that decoupling of G protein from arrestin signaling through biased agonism may offer a clinically viable approach to developing safer opioid analgesics. While this hypothesis is based on knock-out models, it remains an open question whether this effect can be replicated by a small molecule.

The development of biased agonists to selectively modulate GPCR-stimulated G protein or arrestin signaling pathways for the  $\mu$ OR has been met with varied success [12-14]. Specifically, oliceridine (TRV130) provides similar antinociceptive activity to morphine while retaining a high potential for dependence and abuse with no respiratory safety advantages over morphine [15]. Another novel opiate, PZM21, was similarly shown to be less potent than morphine while eliciting undesirable respiratory depression and dose-dependent tolerance [16]. This limited success of designing G protein biased  $\mu$ OR agonists is ultimately hindered by a poor mechanistic understanding of how a ligand's chemical structure influences the receptors conformational state to mediate specific signaling pathways.

To gain structural insight into biased signaling, here we sought to understand the mechanism of  $\mu$ OR recognition and activation by fentanyl, a  $\beta$ -arrestin bias agonist. As ligand binding and unbinding events often occur on the timescales unreachable by standard simulations, we introduced a computationally efficient mollified adaptive biasing potential (mABP) [17] in to the graphics processing unit (GPU) enabled AMBER molecular dynamics (MD) engine to accelerate sampling of rare binding events. Starting from

solvent, we simulated binding events for fentanyl, and two of its more potent derivatives carfentanil and lofentanil, to the  $\mu$ OR. These simulations uncovered a common pose within the receptors orthosteric site consistent with a wealth of historical selectivity and structure-activity relationship studies on the fentanyl scaffold. Within this shared pose, fentanyl induced a unique rotameric conformation of M153<sup>3,36</sup> (Ballesteros-Weinstein numbering), which subsequently displaces W295<sup>6,48</sup>, a conserved “microswitch” critically important for receptor activation in all class A GPCRs [18]. Mutational studies of M153<sup>3,36</sup> reveal its role as a specific “microswitch” for  $\mu$ OR  $\beta$ -arrestin signaling as both fentanyl and DAMGO, a synthetic opioid peptide, require M153<sup>3,36</sup> for  $\beta$ -arrestin but not Gi complex coupling. We further synthesized fentanyl derivatives designed to be unable to module the M153<sup>3,36</sup>  $\beta$ -arrestin microswitch. Consistent with our computationally derived hypothesis, these compounds exhibit no detectable levels of  $\beta$ -arrestin coupling while retaining partial agonist-like Gi coupling. Our study provides a structural basis of fentanyl mediated  $\beta$ -arrestin bias signaling and provides chemical insight for the design of safer fentanyl-based analgesics.

## Results

### *Implementation of fABAMBER*

Expanding upon our prior work to introduce a computationally efficient, scalable mollified ABP (mABP) scheme in the GROAMCS MD engine [19], here we introduced mABP with overflow protection [20] to the graphics processing unit (GPU) accelerated version of pmemd.cuda [21] for AMBER16 [22] which is available for download at Github (<https://github.com/ParkerdeWaal/fABAMBER>). By minimizing communication between GPU and CPU routines, our mABP implementation, termed as fast-Adaptive-Biasing-AMBER (fABAMBER), introduces nearly no overhead to the native MD engine for small and large simulation systems and provides an approximately 3-fold increase in simulation throughput compared to AMBER's Nonequilibrium Free Energy (NFE) toolkit (Figure 1a). Beyond application to ligand binding presented here, fABAMBER can perform free energy calculations using dihedral, distance, and root-mean-square deviation (RMSD) collective variables (CVs) similar to the AMBER's NFE toolkit and the PLUMED 2 [23] plugin for GROMACS. fABAMBER thus allows users to invoke mABP methodologies while leveraging the full computational efficiency of the AMBER's GPU accelerated pmemd.cuda engine. Additionally, both fABAMBER and fABMACS utilize a recent advancement, called overflow protection, that prevents the adaptive bias from driving the system over unrealistic barriers [20]. We discuss the significance of this feature for receptor-ligand binding simulations below.

### *Ligand binding to $\beta$ 2AR and $\mu$ OR*

To assess the accuracy of ligand binding pose prediction for GPCRs using fABAMBER, we first simulated binding of carazolol, an inverse agonist, to the  $\beta$ 2 adrenergic receptor ( $\beta$ 2AR) (Figure S1) [24]. Ligand binding to  $\beta$ 2AR has been previously achieved through brute force computation using ANTON, a specialized computer designed to maximize throughput of unbiased MD steps, and thus serves as a

reasonable test-case [25]. Carazolol was initially placed in solvent above  $\beta$ 2AR. The ligand-receptor conformation space was projected onto a 2D collective variable (CV) space comprising two root-mean-squared deviations (RMSDs) where the ligand was decomposed into its flexible isopropylamino (CV1) and rigid carbazole moieties (CV2; **Figure S1**). All simulations were run for approximately 2  $\mu$ s to provide ample sampling of ligand binding and unbinding events. Importantly, the underlying mABP is blinded to any exogenous information including the crystallographic ligand position and simulations were not manually stopped once the correct pose was found. This system setup was uniformly applied to all simulations performed here.

Initial simulations without bias overfill protection resulted in severe structural deformation as ligand pushed through the receptor's secondary structure (**data not shown**). In a series of overfill protection calibration experiments (**Figure S2**), simulations performed at low (11 and 14 kcal/mol) and high bias (20 kcal/mol) potential fill-limits failed to identify prominent binding events. At a fill-limits of 17 kcal/mol, two of four simulations identifying a common low energy conformation within the receptors orthosteric site which overlapped with the expected crystallographic position with a RMSD less than 0.5 Å (**Figure S1**). Importantly, this pose successfully recaptured both crystallographic hydrogen bonding and salt-bridge interactions.

We next simulated the binding of BU72, a potent morphine-derived agonist [26], to the crystal structure of inactive  $\mu$ OR (**Figures 1b & S3**) [27]. After a series of calibration experiments of fill-limits were performed similar to that of  $\beta$ 2AR (**data not shown**), we selected a 15 kcal/mol fill-limit for all subsequent  $\mu$ OR simulations. Prominent energetic minima were identified within the orthosteric site in two of four simulation replicates (**Figure S4**). The representative ligand conformation captured near-atomic level crystallographic interactions between BU72's morphine core and the  $\mu$ OR (**Figure 1d**). Notably, a salt bridge between the ligand's protonated amine and D149<sup>3,32</sup> and a water mediated hydrogen bonding network between the distal hydroxyl group to Y150<sup>3,33</sup> and H299<sup>6,52</sup>. Slight positional variance of the pendant phenyl ring was observed as we simulated the connecting carbon in its  $sp^3$  tetrahedral configuration while the crystal structure unexpectedly contained a near-planar  $sp^3$  species [28].

### ***Fentanyl binding to the $\mu$ OR***

Encouraged by successful pose identification for carazolol and BU72, we next sought to determine how fentanyl ( $ED_{50} = 0.011$  mg/kg), as well as two more potent derivatives, carfentanil ( $ED_{50} = 0.00032$  mg/kg) and lofentanil ( $ED_{50} = 0.0006$  mg/kg), engage and activate the human  $\mu$ OR (**Figure 2a**) [29]. Carfentanil and lofentanil both differ from fentanyl through a shared carbomethoxy group at the 4-position of the core piperidine ring while lofentanil has an additional cis-methyl group at the 3-position. From six 2- $\mu$ s mABP simulation replicates for each compound, a common low-energy conformation emerged across all three ligands (**Figures 2b,c & S4-S7**). All fentanyl derivatives were oriented in a same latitudinal manner in the

orthosteric binding site, forming extensive hydrophobic contacts between their n-alkyl phenyl and propylamide groups with transmembrane helices (TM) 2/3 and 3/5/6, respectively. The n-aniline ring was oriented downwards towards the receptor's hydrophobic core above M153<sup>3,36</sup>. The piperidine ring is angled towards TM3, allowing for a salt bridge to form between its protonated amine and D149<sup>3,32</sup>. The shared 4-carbomethoxy between carfentanil and lofentanil packs against I298<sup>6,51</sup>, V302<sup>6,55</sup>, W320<sup>7,35</sup>, C323<sup>7,38</sup>, I324<sup>7,39</sup> to provide an additional set of anchoring hydrophobic interactions (Figures 2d,e). The adjoining free ketone group points upwards towards the solvent occupied space above the orthosteric site. Lofentanil's 3-cis methyl is sandwiched between I146<sup>3,29</sup>, D149<sup>3,32</sup>, and Y150<sup>3,33</sup> to increase the hydrophobic interaction surface. Substantial pharmacophore overlap between simulated fentanyl and derivatives to the BU72 bound  $\mu$ OR crystal structure, supporting our computational results (Figure S8) [28].

### ***Internal dynamics, affinity, and selectivity***

Chemical modifications that both minimize ligand conformational entropy and stabilize productive ligand-receptor contacts have been hypothesized to increase ligand potency [19]. To assess how the carbomethoxy and 3-cis methyl groups of carfentanil and lofentanil affect ligand rigidity, we computed the free energy of rotation around a dihedral defined between the n-aniline and the piperidine ring. Fentanyl's largely flat landscape comprised three energetic minima with no barriers greater than 1.1 kcal/mol (Figure 3a). Two global minima were identified within a shared super basin spanning approximately -2 and 0 radians, separated by a negligible saddle, and a secondary local minimum, S3, located at 2 radians. Addition of a 4-carbomethoxy group (carfentanil) shifted the positions of S1 and S2 closer to -2 and 0 radians respectively while increasing the barrier separating these two states from 0.1 to 0.9 kcal/mol. The depth of S3 shrank in favor of the primary super basin containing S1 and S2 which also saw a slight increase in its bounding barriers from 1.1 to 1.25 kcal/mol. Secondary addition of a 3-cis methyl group (lofentanil) drastically altered the dihedral landscape in favor of a single global minimum, S2, that is bounded by steep asymmetrical barriers of approximately 2.5 and 3.0 kcal/mol. Simulation of 3-cis methyl fentanyl similarly shifted the dihedral landscape in favor of the S2 conformation (Figure S9). Across our simulations of fentanyl, carfentanil, and lofentanil, all ligands adopted the energetically favored S2 dihedral conformation state within the receptors orthosteric site (Figure 3b).

We next sought to determine the structural basis of fentanyl  $\mu$ OR selectivity over  $\delta$ OR and  $\kappa$ OR (Figure 3c) [30]. Only two residues differ between the  $\mu$ OR and  $\delta$ OR orthosteric sites: N129<sup>2,63</sup> is a lysine and W320<sup>7,35</sup> is a leucine. W320L<sup>7,35</sup> removes a large hydrophobic cap above the orthosteric site rendering it more solvent accessible. The substitution N129K<sup>2,63</sup> introduced a steric clash between the receptor and the n-alkyl phenyl ring of fentanyl such that ligand binding requires lysine to adopt unfavorable rotameric conformations. Three residues differ between the  $\mu$ OR and  $\kappa$ OR orthosteric sites: N129V<sup>2,63</sup>, V302I<sup>6,55</sup>, and W320Y<sup>7,35</sup>. W320Y<sup>7,35</sup> both introduces steric clash with the ligand and introduces a rigid cap to

prevent access to the orthosteric site. Replacement of V302I<sup>6,55</sup> introduces a slight clash between the amide group of fentanyl, and N129V<sup>2,63</sup> does not directly interact with the bound ligand. Amongst the fentanyl analogs, lofentanil exhibits the least selectivity while fentanyl and carfentanil are highly selective between the  $\mu$ OR,  $\delta$ OR, and  $\kappa$ OR (Figure 3d). These selectivity profiles correlate well with both ligand propensity to adopt the productive S2 dihedral conformation and the degree of steric hindrance to each receptor [30].

### **Structure activity relationship**

To date, several hundred fentanyl analogs have been synthesized, producing a wealth of historical structure-activity-relationship (SAR) data [29]. We next sought to contextualize this SAR data by docking compounds into a rigid receptor configuration obtained from the simulated fentanyl bound state. The “magnificent four” comprise fentanyl ( $ED_{50} = 0.011$  mg/kg) itself, sufentanil ( $ED_{50} = 0.00071$  mg/kg), alfentanil ( $ED_{50} = 0.044$  mg/kg), and remifentanil ( $ED_{50} = 0.004$  mg/kg) which represent the most common members of the 4-anilidopiperidine series used in the clinical setting for pain management. Sufentanil differs from fentanyl through two modifications to the piperidine scaffold: replacement of the n-alkyl phenyl ring with a thiophene ring and an addition of a 4-methoxymethyl group to the piperidine ring. While the thiophene ring occupies a similar footprint to fentanyl’s benzene ring within the hydrophobic cleft of TM2/3, the 4-methoxymethyl serves to both increase the ligand-receptor interaction surface area and decrease the conformational dynamics of the ligand in favor of the productive S2 dihedral conformation similar to that of the 4-carbomethoxy of carfentanil (Figure 4a), consistent with its increased binding potency. In alfentanil, the thiophene ring of sufentanil is replaced with a highly polar 4-ethyl-5-oxo-1H-tetrazol moiety. This n-alkyl tetrazol group is shifted slightly compared to fentanyl and sufentanil’s conjugated rings and makes largely unfavorable contacts within the hydrophobic TM2/3 binding cleft (Figure 4a). Remifentanil, like carfentanil ( $ED_{50} = 0.00032$  mg/kg), contains a 4-carbomethoxy-substituted piperidine ring; however the n-alkyl phenyl ring is replaced with a secondary polar carbomethoxy group. The polar n-alkyl carbomethoxy group is buried down towards the receptors core’s where the hydroxyl group can form a hydrogen bond Y324<sup>7,43</sup> (Figure 4b).

Addition of a methyl group to the piperidine scaffold has yielded one of the more potent fentanyl derivatives, 3-cis-methylfentanyl ( $ED_{50} = 0.00058$  mg/kg) [31]. Within the lofentanil bound pose, the 3-cis methyl group occupies a hydrophobic space between I146<sup>3,29</sup>, D149<sup>3,32</sup>, and Y150<sup>3,33</sup> and restricts the ligand into the productive S2 dihedral conformation (Figures 4c & S9). Replacement of 3-cis methyl with larger functional groups such as –ethyl, –propyl, and other alkyl additions introduce increasing sidechain and backbone clash with TM3 as a function of size (Figures 4d,e). Unlike 3-cis methyl, 3-trans methyl substitution on the piperidine ring ( $ED_{50} = 0.0094$  mg/kg) stabilizes an intermediate ligand conformation found between the S1 and productive S2 dihedral conformations without incurring steric clash with the

receptor (Figure S9). Addition of a 2-cis methyl group ( $ED_{50} = 0.665$  mg/kg) introduces significant steric clash against I146<sup>3,29</sup> to preclude interaction between the ligand's protonated amine and D149<sup>3,32</sup>.

Recent attempts to synthesize bivalent fentanyl derivatives commonly employ extension or functionalization of the amide or n-alkyl groups at the cost of decreased analgesic activity [29, 32, 33]. Our bound pose accommodates these large extensions without altering position of the n-aniline or piperidine rings (Figure 4f). Attempts to model conformationally restricted fentanyl derivatives introduced significant steric clash and prevented the ligand from occupying the identified binding pose (Figure 4g), consistent with the fact that these molecules exhibit insignificant analgesic activity [34, 35]. Together, our bound pose of fentanyl and its derivatives provide a rational, structure based explanation of SAR for the 4-anilidopiperidine series compounds.

### ***M153 mediates $\beta$ -arrestin signaling***

Confident in our computationally derived poses of fentanyl, carfentanil, and lofentanil, we next sought to understand the mechanism of ligand induced biased activation of the receptor. Focusing only on the orthosteric pocket, comparison of the DAMGO-bound active  $\mu$ OR-Gi protein complex cryo-EM structure to our model of the receptor bound to the  $\beta$ -arrestin biased agonist fentanyl revealed largely similar side chain arrangements with exception of M153<sup>3,36</sup> and W295<sup>6,48</sup> (Figure 5a) [36]. Notably M153<sup>3,36</sup> is pushed downward by fentanyl's n-aniline ring, but not in the DAMGO structure, to adopt a rotameric conformation which directly displaces W295<sup>6,48</sup>. This fentanyl induced M153<sup>3,36</sup> rotomer is also not observed in the antagonist bound or morphine derived agonist bound structures of the  $\mu$ OR (Figure S10) [27, 28]. Thus, we hypothesized that fentanyl's unique displacement of M153<sup>3,36</sup> may mediate its  $\beta$ -arrestin biased signaling.

To validate the role of M153<sup>3,36</sup> in  $\beta$ -arrestin biased signaling, we constructed a series of hydrophobic mutations at the M153<sup>3,36</sup> position of decreasing sidechain size and assessed ligand-induced assembly of the receptor with Gi protein complex or with arrestin using a direct interaction NanoBiT assay [37]. All five mutations substantially reduced the  $EC_{50}$  of Gi coupling for both DAMGO and fentanyl, which displayed a correlation with the size of side chain of the mutated residue (Figure 5b). Interestingly, while fentanyl requires M153<sup>3,36</sup> to achieve Gi coupling above 55%, DAMGO was less sensitive to side-chain replacement and retained near 100% coupling for larger amino acid side chains M153F/L/I<sup>3,36</sup>.

Unexpectedly,  $\beta$ -arrestin coupling for both fentanyl and DAMGO exhibit a shared dependence upon M153<sup>3,36</sup>. For the mutations assessed, all but larger amino acid side chains M153F<sup>3,36</sup> and M153F/L<sup>3,36</sup> for DAMGO and fentanyl, respectfully, failed to elicit coupling, and those that retained coupling saw severely reduced maximal levels (Figure 5b). Together, these results suggest that M153<sup>3,36</sup> is required for  $\beta$ -arrestin, but not Gi coupling.



### ***Fentanyl's n-aniline ring mediates $\beta$ -arrestin signaling***

Given the fact that fentanyl's n-aniline ring is directly packed against M153<sup>3,36</sup>, a key residue for  $\beta$ -arrestin signaling, we next sought to determine if fentanyl's n-aniline ring is required for  $\beta$ -arrestin recruitment (Figure 6a). A series of fentanyl derivatives (FD-1, -2, -3) was synthesized where the n-aniline ring was replaced with smaller aliphatic functional groups, which were predicted to have less packing effects on the rotameric conformation of M153<sup>3,36</sup> (Figure 6b).

All three derivatives exhibited significantly reduced EC<sub>50</sub> and maximal Gi coupling compared to fentanyl, where ligand potency increased as a function of aliphatic group size (Figure 6c). One compound in particular, propyl substituted FD-3, retained partial-agonist properties comprising a mid-nanomolar EC<sub>50</sub> with a maximal coupling efficiency that is approximately 67% that of morphine [16] and comparable to the M153I<sup>3,36</sup>. All of our derivatives were completely Gi biased and failed to elicit any detectable level of  $\beta$ -arrestin coupling up to 4  $\mu$ M (Figure 6c). Taken together with our prior mutational analysis, these experiments suggest that the n-aniline ring is required for fentanyl mediated  $\beta$ -arrestin, but not Gi coupling, and this effect is mediated through an interaction with M153<sup>3,36</sup>.

### ***Discussion***

Enhanced sampling methods for molecular dynamics (MD) are often invoked to accelerate simulations of rare events for biological systems [38], such as ligand binding and release. In this study, we implemented a previously derived efficient mABP scheme [17] with minimal communication to the GPU enabled AMBER MD engine, which significantly reduced the computational time to sample rare events while providing high-density simulation throughput.

During our initial benchmarking and system testing simulations of carazolol binding to  $\beta$ 2AR, we found that overfill protection [20] was essential to our success. Overfill protection prevents trajectory "spoiling", arising from the bias potential pushing the ligand through the protein causing irreversible structural deformation events. Interestingly, a relationship between bias potential fill-limit and successful ligand binding events was observed. Simulations performed at lower fill-limit resulted in no binding events, whereas those performed at higher fill-limit resulted in many ligand entry events into the orthosteric pocket, but failed to identify any dominant bound conformation. For  $\mu$ OR binding simulations, we arrived at a fill-limit lower than that used for  $\beta$ 2AR simulations. Unlike the orthosteric site of  $\beta$ 2AR which is partially occluded by the receptor's extracellular loop 2, the  $\mu$ OR has no such barrier above the orthosteric site. These experiments suggest a careful fill-limit calibration is required to ensure that the bias potential is high enough to sample rare events without spoiling the trajectory. Likely, this value varies between GPCRs and potentially between different ligands.

Simulations of fentanyl, carfentanil, and lofentanil identified a common shared pose within the receptor's orthosteric site that makes chemically favorable interactions with the  $\mu$ OR. As the ligand's scaffold comprising the n-aniline, piperidine, and n-alkyl phenyl rings remains unchanged, the degree of within- and between-ligand convergence across independent mABP simulations largely improves the statistical confidence in the bound conformation. Importantly, each ligand's protonated amine was found to form a salt-bridge with D149<sup>3,32</sup>. As with other aminergic GPCRs, interaction with this fully conserved D<sup>3,32</sup> provides a critical anchoring point for ligand orientation and is an essential feature for receptor activation [18]. We note that recent attempts to "dock" fentanyl to the  $\mu$ OR did not observe this key interaction conserved for class A biological amine receptors[39]. For studies that correctly identify the D<sup>3,32</sup> salt bridge, the resulting pose is sterically incompatible with fentanyl derivatives bearing n-alkyl or amide extensions [40, 41]. The mABP approach employed here offers a major advantage over virtual screening by employing a fully dynamic, unrestrained, explicitly solvated membrane environment [42]. For these reasons, this technique has also proved valued in systems with induced-fit mechanics [43].

Beyond their described roles of increasing the ligand-receptor interaction surface area, we also sought to understand how modifications to the piperidine ring affect conformational heterogeneity around the n-aniline and piperidine rings. All tested piperidine additions reduced conformational heterogeneity, with the 3-cis methyl group contributing a majority of this effect over 4-carboxymethyl. As lofentanil exhibited only one energetically favorable dihedral conformation, we hypothesize the S2 conformation is productive for both ligand binding and receptor activation (Figures 3a,b). Indeed, all of our  $\mu$ OR bound poses for fentanyl, carfentanil and lofentanil adopted the S2 dihedral state within the receptors orthosteric site. These simulations not only inform on the structural influence of piperidine scaffold modifications, but also provide strong support in favor of the common binding conformation for fentanyl and its derivatives in the orthosteric site.

Fentanyl and its derivatives display robust affinity and selectivity for the  $\mu$ OR over the  $\delta$ OR and  $\kappa$ OR despite limited perturbations to the orthosteric site amino acid composition [30]. By modelling the  $\delta$ OR orthosteric site onto our fentanyl bound pose, we proposed N129K<sup>2,63</sup> to be the largest contributor to the decreasing binding affinity. The larger side chain of the lysine perturbs the shape of the orthosteric binding pocket. Unlike the  $\delta$ OR, the only possible W320Y<sup>7,35</sup> rotomer in  $\kappa$ OR introduces direct steric clash with the ligand's rigid core. Based on this structural analysis, an ordered ranking affinity for fentanyl derivatives was predicted as  $\mu$ OR >  $\delta$ OR >  $\kappa$ OR, consistent with observed *in-vivo* potencies [30].

We next sought to provide a rational structure-based explanation for historical SAR of the fentanyl scaffold. Modifications to the 4-position on the piperidine ring were found to increase binding affinity by both increasing the ligand-receptor interface and propensity to adopt the productive S2 dihedral conformation, consistent with the increased efficacy seen in sufentanil over fentanyl. This increased

potency can be offset by replacing the n-alkyl group with a polar moiety, which introduces repulsive interactions to the hydrophobic TM2/3 cleft. This change accounts for the affinity decrease from sufentanil to alfentanil and from carfentanil to remifentanil. These polar groups may also interfere with formation of a hydrogen bond between D149<sup>3,32</sup> and Y324<sup>7,43</sup> observed in both crystal and cryo-EM structures of agonist bound  $\mu$ OR [28, 36]. As agonists stabilize this conserved hydrogen bond [18, 44], we speculate that its disruption by polar n-alkyl groups will negatively affect receptor activation. In addition, fentanyl's bound conformation provides a rational explanation for alkyl substitutions around the piperidine scaffold. We further explored compatibility of fentanyl analogs with amide and n-alkyl extensions. While these functionalizations greatly diminishes  $\mu$ OR activity [32, 33], we successfully docked examples of both ligand types in conformations that do not alter the core-ligand interaction interface comprising the n-aniline and piperidine rings. As we previously noted, prior studies have been unable to identify bound conformation-compatible amide and n-alkyl extensions [40, 41]. Lastly, we found that rigid n-aniline and fused-alkyl fentanyl derivatives prevent ligand binding through the introduction of severe steric clash, consistent with their inability to induce antinociceptive properties [34, 35]. Together, our bound pose of fentanyl and its derivatives provides a rational, structure-based explanation of SAR for the 4-anilidopiperidine series compounds which further support the bound conformation of fentanyl as observed in our simulations.

Comparison of fentanyl and its derivatives to structures of agonist- and antagonist-bound  $\mu$ ORs revealed a unique M153<sup>3,36</sup> rotameric conformation previously unobserved [27, 28, 36]. Mediated by the common n-aniline ring, the rotomers of M153<sup>3,36</sup> directly influences the conserved W295<sup>7,35</sup> microswitch, critical for class A GPCR receptor activation. Mutational studies revealed a unique sensitivity to M153<sup>3,36</sup> perturbations for fentanyl-mediated but not DAMGO-mediated, maximal  $G_i$  coupling levels. As fentanyl's n-aniline ring is buried deeply within the orthosteric site to displace M153<sup>3,36</sup> unlike DAMGO, this sensitivity is consistent with each ligand's spatially distinct binding footprint. We thus hypothesized that fentanyl's ability to displace M153<sup>3,36</sup> is required for  $\beta$ -arrestin, but not  $G_i$ , coupling. We reasoned that replacing the bulky n-aniline ring of fentanyl with smaller aliphatic groups would diminish the ligand's  $\beta$ -arrestin biased signaling profile. Indeed, all of the fentanyl analogs failed to induce  $\beta$ -arrestin coupling while one compound in particular, propyl-substituted FD-3, retained partial  $G_i$  coupling levels with nanomolar efficacy, comparable to M153<sup>3,36</sup> mutations. We propose a mechanism where the n-aniline ring of fentanyl mediates  $\mu$ OR  $\beta$ -arrestin through a novel M153<sup>3,36</sup> microswitch. Together, our study provides structural insight into fentanyl-mediated  $\beta$ -arrestin biased signaling and provides chemical insights to the design of novel fentanyl-based analgesics that exhibit complete bias toward  $G_i$  coupling.

In summary, through adaptively biased molecular dynamics simulations we have derived a common binding pose for the fentanyl derivatives within the  $\mu$ OR orthosteric ligand binding pocket. This binding pose is consistent with the vast SAR data from large numbers of fentanyl-related compounds. Moreover,

this fentanyl binding mode has allowed us to determine the critical role of a single residue, M153<sup>3,36</sup>, for  $\mu$ OR  $\beta$ -arrestin biased signaling, which is further validated by fentanyl derivatives that are capable of mediating G protein signaling but specifically devoid of  $\beta$ -arrestin biased signaling. These results demonstrate the level of our understanding for the biased signaling in the  $\mu$ OR-fentanyl system. Beyond application to the  $\mu$ OR-fentanyl system, our findings also have broader impacts for our understanding on biased signaling in other class A GPCRs. Similarly, subtle changes in the chemical structures of  $\beta_2$ AR ligands [45] or single residue mutation in the serotonin receptor 5-HT<sub>2B</sub> [46] can also alter the biased signaling specificity by these receptors, demonstrating that GPCR signaling specificity can be altered by very minor changes either in the receptor itself or in the chemical structures of the bound ligands.

## Methods

### *Molecular dynamics simulation setup and equilibration*

All-atom atomospheric simulations of the human  $\beta_2$ AR (PDB Code: 2RH1) and  $\mu$ OR (PDB Code: 4DKL) were performed in the NPT ensemble with periodic boundary conditions and the CHARMM36m forcefield [47]. From the inactive crystal structures, both receptors were prepared by removing all non-GPCR protein chains, fusions partners, and heteroatoms including the crystallographic ligand. Mouse  $\mu$ OR was humanized and subjected to 5,000 rounds of refinement using Modeller9.18 [48]. ICL3 was left unbuilt for both receptors. Protonation states of titratable residues were set in agreement with prior simulations of inactive GPCRs [49] and histidines were modelled with an explicit proton on their epsilon nitrogen. The allosteric sodium interacting with D<sup>2.50</sup> was modeled to further mimic the receptors inactive conformation [50]. Each receptor was then capped with neutral acetyl and methylamine groups and embedded into a pre-equilibrated palmitoyl-oleoyl-phosphatidylcholine (POPC) lipid bilayer, solvated in a box of TIP3P waters allowing for 14 Å of padding on all sides with 150 mM NaCl, and neutralized by removing appropriate ions or counter ions using the Desmond system builder within Maestro (Schrödinger Release 2018-1: Maestro, Schrödinger, LLC, New York, 2018).

Prior to mABP production simulations, 25,000 steps of energy minimization were carried out followed by equilibration in the NVT and NPT ensembles for 10 and 50 ns respectively with harmonic restraints (10 kcal mol<sup>-1</sup> Å<sup>-2</sup>) placed on all C $\alpha$  atoms. Temperature and pressure were maintained at 310 K and 1 bar by the Langevin thermostat and Berendsen barostat with semi-isotropic coupling. An additional 50 ns of unrestrained NPT simulation was performed with the Monte Carlo barostat. For all simulations, a 2 fs time-step was used and bonds involving hydrogen atoms were constrained by SHAKE with non-bonded interactions cut at 8 Å. Trajectory frames saved every 10 ps. After equilibration, ligands were placed approximately 10 Å above the orthosteric site. Ligand parameters were generated by the CHARMM General Force Field [51].

### *Ligand binding simulations and pose extraction*

To accelerate sampling of ligand binding, we implemented our previously described mABP scheme [17] with overflow protection [20] into the GPU-enabled pmemd.cuda molecular dynamics [21] engine for both AMBER16 [22]. Two RMSD CVs were defined between each ligand and the receptor (**Figures S1&S3**). The receptor reference points of CV1 and CV2 are two dynamically updating centers-of-geometry comprising C $\alpha$  atoms found below the orthosteric site in TM2/3/7 and TM3/5/6 respectively. From the geometric center of the CV1 and CV2 references, a receptor center is dynamically calculated and serves as the origin for a cylindrical restraint (radius = 18 Å). This restraint is combined with a maximal allowable CV value of 22 Å to prevent unwanted ligand diffusion away from the receptor and into periodic images. The collective variable space was discretized into a 480 x 480 grid and ranged from 0 to 60 Å for a bin width of 0.125 Å. Biasing parameters were  $b = 0.9$ ,  $c = 0.005/\delta t$ ,  $\alpha = 20$ . mABP production simulations of in replicates of 2  $\mu$ s were performed in the NTP ensemble. All simulation parameters and trajectories are available upon request. fABAMBER patches for AMBER16 can be found on Github (<https://github.com/ParkerdeWaal/fABAMBER>).

Representative pose extraction for each ligand was performed as follows: The free-energy landscape of simulations that identified energetic minima within the orthosteric site were combined and averaged. Simulations without ligand binding events were discarded. A square region comprising the averaged minima was defined and all trajectory frames within this CV space were extracted into a combined subtrajectory comprising only the ligand. The most representative ligand configuration was determined using the DBSCAN clustering algorithm [52] within CPPTRAJ [53] where each cluster required a minimum of 25 points with a distance cutoff between points of 0.7 Å.

### ***Fentanyl dihedral simulations***

Fentanyl and its derivatives were individually solvated in a box of TIP3P waters with a minimum of 8 Å padding and neutralized with the addition of a single sodium ion. Each system was equilibrated in the NVT and NPT ensembles for 10 and 10 ns respectively using largely the same temperature and pressure coupling schemes used for GPCR simulations where only the pressure-coupling scheme was changed to isotropic. A single common dihedral CV for all ligands was defined by atoms connecting the n-aniline and piperidine scaffold and discretized into a 300 x 300 grid ranging from 0 to  $2\pi$  radians. Biasing parameters were  $b = 0.8$ ,  $c = 0.1/\delta t$ ,  $\alpha = 5$ . mABP simulations lasting 500 ns were performed in the NTP ensemble for each ligand.

### ***Fentanyl derivative docking***

Flexible ligand docking of fentanyl derivatives into a rigid fentanyl bound  $\mu$ OR receptor snapshot was performed using DOCK6.9 [54]. Prior to docking, the W320<sup>7.35</sup> rotomer was adjusted to accommodate 4-position substitutions to the piperidine scaffold, each ligand was energy minimized, and partial charges were derived using CHIMERA [55].

### **Plasmid construction**

The human  $\mu$ OR, Gai1, G $\beta$ 1, Gy2, and  $\beta$ -arrestin2 cDNAs were codon-optimized and synthesized by GENEWIZ (Suzhou, China). The site-directed mutations were introduced into  $\mu$ OR (M153A, M153F, M153I, M153L, and M153V) using PCR.

For  $\beta$ -arrestin recruitment assay, the cDNAs of human  $\mu$ OR (wild type and M153 mutants), as well as pre-activated  $\beta$ -arrestin2 harboring 3A mutations (residues 1-393, I386A, V387A and F388A) (Kang et al., 2015) were inserted into a NanoBiT PPI plasmid (Promega). The large subunit (LgBiT) was positioned at the C-termini of receptor, and the small subunit (SmBiT) was positioned at the N-terminus of  $\beta$ -arrestin2 (3A).

For Gi activation assay, the cDNAs of receptors were subcloned into a modified pfastbac1 vector (Invitrogen), which contained an expression cassette with a haemagglutinin (HA) signal sequence at the N terminus and LgBiT at the C terminus. The human cDNA of Gai1, G $\beta$ 1 and Gy2 were separately inserted into pfastbac1 vector, while the SmBiT was fused to C terminus of G $\beta$ 1 subunit.

### **Sf9 cell membrane preparation and Gi activation assay**

High-titer recombinant baculovirus ( $>10^9$  virus particles per ml) of  $\mu$ OR (wild type and mutants), Gai1, G $\beta$ 1 and Gy2 was obtained using Bac-to-Bac Baculovirus Expression System (Invitrogen) as previously described [56, 57]. Cell suspensions were cultured for 4 days while shaking at 27 °C to generate P1 virus. Sf9 cells at a density of  $2 \times 10^6$  cells/ml were co-infected with P2 virus stock of receptor, Gai1, G $\beta$ 1 and Gy2 at a volume ratio of 1:1:1:1. The cells were harvested by centrifugation after 48 hours post-infection.

Sf9 cell membranes were disrupted by homogenization in a hypotonic buffer containing 10 mM HEPES (pH 7.5), 10 mM MgCl<sub>2</sub>, 20 mM KCl and protease inhibitor cocktail (Vazyme, Nanjing, China). Cell membranes were then separated by ultracentrifugation at 45,000 g/min for 30 min. The membrane pellets were resuspended in Phosphate Buffer Saline (1×PBS, pH 7.4) and stored at -80 °C until use.

A modified NanoBiT assay was performed to evaluate Gi activation [37]. Briefly, sf9 membrane containing  $\mu$ OR or its mutants were added into 384-well white plates (Greiner) at 20  $\mu$ l/well. NanoLuc substrates (Promega, after 1:20 dilution) were added at 10  $\mu$ l/well followed by incubation by 10  $\mu$ l of 4×compound solutions for 15 min at room temperature. The luminescence was measured at 700 nm using a Perkin-Elmer EnVision plater reader. Results were plotted and analyzed in GraphPad Prism 7.0.

### **AD-293 cell transfection and $\beta$ -arrestin recruitment assay**

The human embryonic kidney AD-293 cells (Agilent) were cultured in growth medium that consisted of Dulbecco's modified Eagle's medium (DMEM) with 10% fetal bovine serum (Invitrogen) at 37 °C in the

presence of 95% O<sub>2</sub> and 5% CO<sub>2</sub>. Cells were plated at a density of 5×10<sup>5</sup> cells/well of a 6-well plate for overnight. Using FuGENE<sup>®</sup> HD (Promega), cells were transfected with 1.5 μg receptor plasmid and 1.5 μg β-arrestin2 (3A) plasmid per well and then cultured for 24 hours.

A modified NanoBiT assay was performed to evaluate β-arrestin recruitment [37]. On the day of assay, transfected cells were harvested and resuspended using Opti-MEM (Invitrogen). The cell density was adjusted to 4×10<sup>5</sup> cells/ml before plating cells into 384-well white plates (Greiner) per 20 μl/well. 10 μl/well of NanoLuc substrate (Promega, after 1:20 dilution) was added followed by addition of 10 μl/well indicated concentration of 4×compounds solutions. After 15 min incubation, luminescence was recorded in Perkin-Elmer EnVision plate reader, and curves were generated and analyzed using Graphpad Prism 7.0.

### Fentanyl derivative synthesis

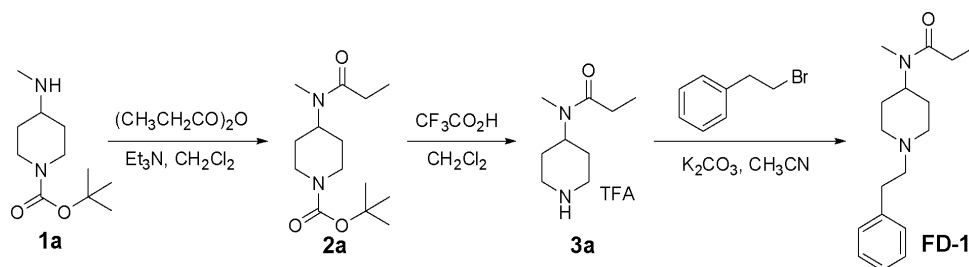

Methods for synthesis of compound **FD-1**:

The appropriate anhydride (1.2 equiv) was added slowly to a stirred 0.5 M solution of compound **1a** (1 mmol) and Et<sub>3</sub>N (2.0equiv) in CH<sub>2</sub>Cl<sub>2</sub> at RT. After having been stirred for 5 h, the reaction mixture was quenched with water. The organic layer was washed with saturated NaHCO<sub>3</sub> (aq), 1 M HCl, and brine. The extract was dried over Na<sub>2</sub>SO<sub>4</sub> and concentrated to provide amides **2a** which was used directly. MS (m/e): 271.3 (M+1); Trifluoroacetic acid (1 mL) was added dropwise to a solution of **2a** (1 mmol) in 1 ML of dry CH<sub>2</sub>Cl<sub>2</sub> at 0°C. Then the mixture was stirred at RT for 3h. After removal of the solvents, the residue was dissolved in CH<sub>3</sub>CN (5 mL), K<sub>2</sub>CO<sub>3</sub> (5 eq) and (2-bromoethyl)benzene (1.2eq) was added. The mixture was stirred at RT for 10 h. Filtered and the filtrate was concentrated. The crude product was purified by preparative thin layer chromatography (CH<sub>2</sub>Cl<sub>2</sub>/MeOH, 20:1) to afford **FD-1** (0.19g, 69%). MS (m/e): 275.5 (M+1); <sup>1</sup>H NMR (400 MHz, CDCl<sub>3</sub>) δ: 7.32-7.14 (m, 5H), 4.60-4.45 (m, 0.7H), 3.64-3.52 (m, 0.3H), 3.14-2.98 (m, 2H), 2.89-2.72 (m, 5H), 2.62-2.53 (m, 2H), 2.41-2.23 (m, 2H), 1.97-1.53 (m, 4H), 1.1 5(q, 3H).

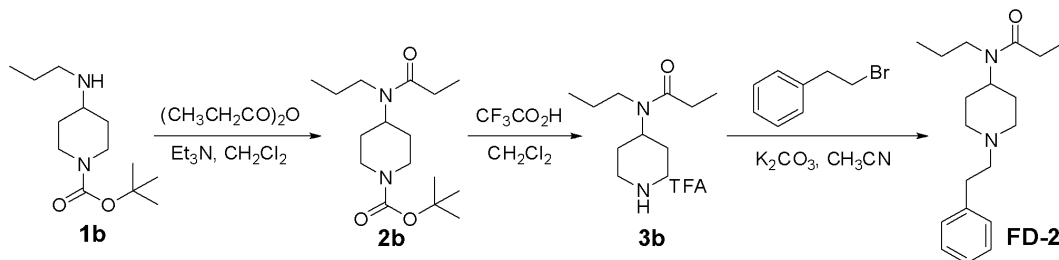

### Methods for synthesis of compound **FD-2**:

The appropriate anhydride (1.2 equiv) was added slowly to a stirred 0.5 M solution of compound **1b** (1 mmol) and Et<sub>3</sub>N (2.0equiv) in CH<sub>2</sub>Cl<sub>2</sub> at RT. After having been stirred for 5 h, the reaction mixture was quenched with water. The organic layer was washed with saturated NaHCO<sub>3</sub> (aq), 1 M HCl, and brine. The extract was dried over Na<sub>2</sub>SO<sub>4</sub> and concentrated to provide amides **2b** which was used directly. MS (m/e): 299.4 (M+1); Trifluoroacetic acid (1 mL) was added dropwise to a solution of **2b** (1 mmol) in 1 ML of dry CH<sub>2</sub>Cl<sub>2</sub> at 0°C. Then the mixture was stirred at RT for 3h. After removal of the solvents, the residue was dissolved in CH<sub>3</sub>CN (5 mL), K<sub>2</sub>CO<sub>3</sub> (5 eq) and (2-bromoethyl)benzene (1.2eq) was added. The mixture was stirred at RT for 10 h. Filtered and the filtrate was concentrated. The crude product was purified by preparative thin layer chromatography (CH<sub>2</sub>Cl<sub>2</sub>/MeOH, 20:1) to afford **FD-2** (0.21g, 70%). MS (m/e): 303.4 (M+1); <sup>1</sup>H NMR (400 MHz, CDCl<sub>3</sub>) δ: 7.35-7.16 (m, 5H), 4.54-4.41 (m, 0.7H), 3.64-3.50 (m, 0.3H), 3.23-3.01 (m, 4H), 2.87-2.75 (m, 2H), 2.66-2.50 (m, 2H), 2.42-2.30 (m, 2H), 2.20-2.01 (m, 2H), 1.95-1.49 (m, 6H), 1.21-1.13 (m, 3H), 0.95-0.85 (m, 3H).

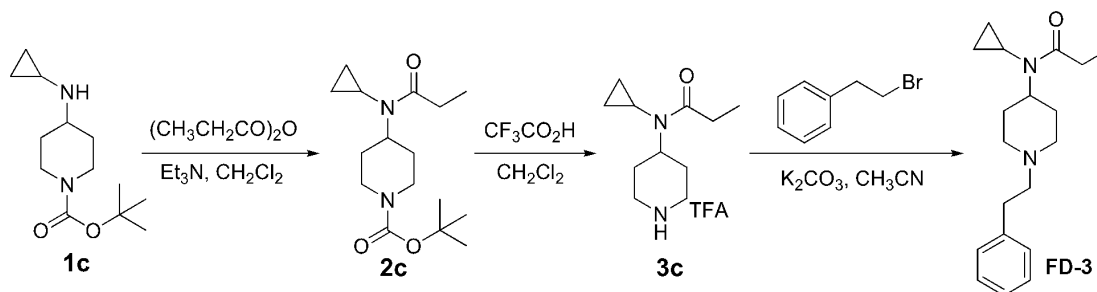

### Methods for synthesis of compound **FD-3**:

The appropriate anhydride (1.2 equiv) was added slowly to a stirred 0.5 M solution of compound **1c** (1 mmol) and Et<sub>3</sub>N (2.0equiv) in CH<sub>2</sub>Cl<sub>2</sub> at RT. After having been stirred for 5 h, the reaction mixture was quenched with water. The organic layer was washed with saturated NaHCO<sub>3</sub> (aq), 1 M HCl, and brine. The extract was dried over Na<sub>2</sub>SO<sub>4</sub> and concentrated to provide amides **2c** which was used directly. MS (m/e): 297.3 (M+1); Trifluoroacetic acid (1 mL) was added dropwise to a solution of **2c** (1 mmol) in 1 ML of dry CH<sub>2</sub>Cl<sub>2</sub> at 0°C. Then the mixture was stirred at RT for 3h. After removal of the solvents, the residue was dissolved in CH<sub>3</sub>CN (5 mL), K<sub>2</sub>CO<sub>3</sub> (5 eq) and (2-bromoethyl)benzene (1.2eq) was added. The mixture was stirred at RT for 10 h. Filtered and the filtrate was concentrated. The crude product was purified by preparative thin layer chromatography (CH<sub>2</sub>Cl<sub>2</sub>/MeOH, 20:1) to afford **FD-3** (0.20g, 67%). MS (m/e): 301.4 (M+1); <sup>1</sup>H NMR (400 MHz, CDCl<sub>3</sub>) δ: 7.34-7.18 (m, 5H), 4.26-4.04 (m, 1H), 3.14-3.02 (m, 2H), 2.87-2.75 (m, 2H), 2.66-2.40 (m, 5H), 2.19-1.94 (m, 4H), 1.85-1.70 (m, 2H), 1.15 (t, 3H), 0.94-0.8 (m, 4H).

### Figure Legends

**Figure 1. fABAMBER benchmarking and application to ligand binding.** a, fABAMBER performance compared to AMBER's native GPU enabled simulation engine and NFE toolkit. b, Example initial system



configuration for ligand binding simulations where the  $\mu$ OR is represented in white and the morphine derived agonist BU72 is shown in orange. **c**, Averaged free energy landscape for BU72 mABP ligand binding simulations. Contours are drawn at 1, 3, and 5 kcal/mol. **d**, Structural overlap of BU72's predicted low-energy conformation (white cartoon and orange sticks) and crystallographic position (PDB Code: 5C1M; blue).

**Figure 2. A common pose for fentanyl binding.** **a**, Chemical structure of fentanyl, carfentanil, and lofentanil. **b-c**, Structural superposition and sidechain interactions of fentanyl and its derivatives within the  $\mu$ OR orthosteric site and their corresponding averaged free energy landscapes. Contours are drawn at 1, 3, and 5 kcal/mol. **d**, Side-by-side comparison of side-chain interactions mediated through lofentanil's 3-cis methyl group and a common 4-carbomethoxy shared by carfentanil.

**Figure 3. Piperidine rigidity influences both affinity and selectivity.** **a**, N-aniline-piperidine connecting dihedral free energy landscapes. S2 dihedral occupancy for fentanyl, carfentanil, and lofentanil was calculated to be 38.5%, 43.4%, and 75.9% respectively. **b**, Superposition of lofentanil's optimal S2 dihedral conformation with low-energy conformations identified in mABP ligand binding simulations. **c**, Comparison of  $\mu$ OR,  $\delta$ OR,  $\kappa$ OR orthosteric site amino acid compositions and selectivity structural analysis. **d**, Correlation between S2 dihedral propensity with *in-vitro* potencies taken from ref (Maguire et al., 1992).

**Figure 4. Docking and modelling of various fentanyl derivatives.** **a-b**, Docking and sidechain interactions of fentanyl, sufentanil, and alfentanil (a), and carfentanil, and remifentanil (b). Relative potencies (*in-vivo* ED<sub>50</sub>) are taken from ref [29] and are displayed as a fold-difference from fentanyl in the upper left corner of each panel. **c**, Modelling of various 3-cis alkyl groups. Relative potencies (*in-vivo* ED<sub>50</sub>) are taken from ref [31] and are displayed as a fold-difference from fentanyl. **d**, Docking and sidechain interactions of fentanyl derivatives bearing amide (Compound 4D [33]) or n-alkyl phenyl (Fen-Acry-PEO<sub>7</sub> [32]) extensions. **e**, Modeling of fused-ring fentanyl derivatives.

**Figure 5. Effects of M153 mutations on ligand induced  $\beta$ -arrestin and Gi complex coupling.** **a**, Side-by-side structural comparison of orthosteric site interactions between DAMGO (PDB code: 6DDE) and fentanyl bound  $\mu$ OR. **b-c**, Dose-response curve for DAMGO and fentanyl induced Gi complex and  $\beta$ -arrestin coupling for wildtype and M153<sup>3,36</sup> mutant receptors measured by nanoBiT direct interaction assays. EC<sub>50</sub> and maximal coupling efficacy compared to DAMGO are shown. Values and error bars reflect mean  $\pm$  s.e.m. normalized to DAMGO of three technical replicates.

**Figure 6. Fentanyl derivatives with no  $\beta$ -arrestin signaling.** **a-b**, Structure based rational and chemical structure of newly synthesized fentanyl derivatives. **c**, Gi complex and  $\beta$ -arrestin coupling dose-response

curve for DAMGO, fentanyl, and compounds FD1-3 measured by nanoBiT direction interaction assays.  $EC_{50}$  and maximal coupling efficacy compared to DAMGO are shown. Values and error bars reflect mean  $\pm$  s.e.m. normalized to DAMGO of three technical replicates.

### Supplemental Figure Legends

**Figure 1S. Detailed mABP simulation setup and binding of carazolol to  $\beta$ 2AR.** **a-b**, graphical representation of collective variables and cylindrical restraints used in mABP simulations. **c**, Averaged free energy landscape for carazolol binding to the  $\beta$ 2AR. Contours are drawn at 1, 3, and 5 kcal/mol. **d**, Structural overlap of carazolol's predicted low-energy conformation (white cartoon; orange sticks) and crystal structure (PDB Code: 2RH1; light blue sticks).

**Figure S2. Carazolol fill limit calibration.** **a**, Distance between carazolol's protonated amine to D113<sup>3,32</sup> for various bias potential fill-limits. **b**, Free energy landscapes of mABP simulations where the bias potential was capped at 17 kcal/mol. Contours are drawn at 1, 3, and 5 kcal/mol.

**Figure S3. BU72 and fentanyl collective variables.** **a**, Ligand atom selections for CV1 and CV2.

**Figure S4. BU72 mABP simulations.** **a**, Free energy landscapes of simulation replicates. Contours are drawn at 1, 3, and 5 kcal/mol. **b**, Distance between BU72's protonated amine to D149<sup>3,32</sup>.

**Figure S5. Fentanyl mABP simulations.** **a**, Free energy landscapes of simulation replicates. Contours are drawn at 1, 3, and 5 kcal/mol. **b**, Distance between fentanyl's protonated amine to D149<sup>3,32</sup>.

**Figure S6. Carfentanil mABP simulations.** **a**, Free energy landscapes of simulation replicates. Contours are drawn at 1, 3, and 5 kcal/mol. **b**, Distance between carfentanil's protonated amine to D149<sup>3,32</sup>.

**Figure S7. Lofentanil mABP simulations.** **a**, Free energy landscapes of simulation replicates. Contours are drawn at 1, 3, and 5 kcal/mol. **b**, Distance between lofentanil's protonated amine to D149<sup>3,32</sup>.

**Figure S8. Structural comparison of BU72 and carfentanil.** **a**, Side-by-side structural and pharmacophore comparison between BU72 (PDB code: 5C1M) and carfentanil bound  $\mu$ OR.

**Figure S9. Extended n-aniline-piperidine ring dihedral free energy landscape.** **a**, S2 dihedral occupancy for fentanyl, carfentanil, and lofentanil, 3-cis methyl fentanyl, and 3-trans methyl fentanyl was calculated to be 38.5%, 43.4%, 75.9%, 56.3%, and 34.7% respectively.

**Figure S10. Orthosteric site structural comparison of antagonist, agonist, and fentanyl bound structures. a.** Side-by-side comparison of antagonist (PDB code: 4DKL), agonist (PDB code: 5C1M), and predicted fentanyl bound pose. M153<sup>3,36</sup> and W295<sup>6,48</sup> side-chain rearrangements are annotated.

#### **Acknowledgments:**

This work was inspired by National Public Radio's, and Michigan Public Radio's (WVGR 104.1 FM), continuous coverage of the national opioid overdose epidemic and is in part supported by the Van Andel Institute Graduate School (P.W.d.W), the Jay and Betty Van Andel Foundation (K.M, B.M.D, and H.E.X.), and the National Natural Science Foundation (31770796 to Y.J.), the National Science and Technology Major Project (2018ZX09711002 to Y.J.); the K.C. Wong Education Foundation (Y.J.). Computation for the work described in this paper was supported by the High Performance Cluster and Cloud Computing (HPC3) Resource at the Van Andel Research Institute.

#### **Data availability statement:**

Parameters, initial coordinates, and simulation restart files for all systems are available in the fABAMBER github page. All trajectories are available upon request .

#### **Competing interests:**

The authors declare no conflicts of interest.

#### **Author Contributions:**

P.W.d.W. implemented fABAMBER, designed, performed, and analyzed MD simulations, designed mutational, coupling studies, fentanyl derivatives, and analyzed all corresponding data, wrote the manuscript, and prepared figures; J.S. and E.Y. synthesized fentanyl derivatives; K.M. provided experimental feedback, edited the manuscript and supervised P.W.d.W.; Y.J. designed and performed mutational and coupling assays, and supervised X.W.; H.E.X. designed research, edited and wrote part of manuscript, and supervised P.W.d.W, Y.J., J. S., and E. Y.; B.M.D. conceived the project, initiated collaboration with H.E.X, edited the manuscript, and supervised computational work performed by P.W.d.W.

#### **References**

1. Matthes HW, Maldonado R, Simonin F, Valverde O, Slowe S, Kitchen I, et al. Loss of morphine-induced analgesia, reward effect and withdrawal symptoms in mice lacking the mu-opioid-receptor gene. *Nature*. 1996;383(6603):819-23. Epub 1996/10/31. doi: 10.1038/383819a0. PubMed PMID: 8893006.
2. Melnikova I. Pain market. *Nature Reviews Drug Discovery*. 2010;9:589-90. doi: 10.1038/nrd3226.
3. Scholl LaS, Puja and Kariisa, Mbabazi and Wilson, Nana and Baldwin, Grant. Drug and opioid-involved overdose deaths—United States, 2013--2017. *Morbidity and Mortality Weekly Report*. 2019;67. doi: 10.15585/mmwr.mm675152e1.
4. Valdez CA, Leif RN, Mayer BP. An Efficient, Optimized Synthesis of Fentanyl and Related Analogs. *PLOS ONE*. 2014;9(9):e108250. doi: 10.1371/journal.pone.0108250.

5. Volkow ND, Collins FS. The Role of Science in Addressing the Opioid Crisis. *New England Journal of Medicine*. 2017;377(4):391-4. doi: 10.1056/NEJMs1706626.
6. Connor M, Christie MD. Opioid receptor signalling mechanisms. *Clin Exp Pharmacol Physiol*. 1999;26(7):493-9.
7. Groer CE, Tidgewell K, Moyer RA, Harding WW, Rothman RB, Prisinzano TE, et al. An Opioid Agonist that Does Not Induce  $\mu$ -Opioid Receptor—Arrestin Interactions or Receptor Internalization. *Mol Pharmacol*. 2007;71(2):549-57. doi: 10.1124/mol.106.028258.
8. Raehal KM, Walker JKL, Bohn LM. Morphine Side Effects in  $\beta$ -Arrestin 2 Knockout Mice. *J Pharmacol Exp Ther*. 2005;314(3):1195-201. doi: 10.1124/jpet.105.087254.
9. Bohn LM, Lefkowitz RJ, Caron MG. Differential mechanisms of morphine antinociceptive tolerance revealed in (beta)arrestin-2 knock-out mice. *J Neurosci*. 2002;22(23):10494-500. Epub 2002/11/27. PubMed PMID: 12451149.
10. Bohn LM, Gainetdinov RR, Lin FT, Lefkowitz RJ, Caron MG. Mu-opioid receptor desensitization by beta-arrestin-2 determines morphine tolerance but not dependence. *Nature*. 2000;408(6813):720-3. Epub 2000/12/29. doi: 10.1038/35047086. PubMed PMID: 11130073.
11. Bohn LM, Lefkowitz RJ, Gainetdinov RR, Peppel K, Caron MG, Lin FT. Enhanced morphine analgesia in mice lacking beta-arrestin 2. *Science*. 1999;286(5449):2495-8. Epub 2000/01/05. doi: 10.1126/science.286.5449.2495. PubMed PMID: 10617462.
12. Chen X-T, Pitis P, Liu G, Yuan C, Gotchev D, Cowan CL, et al. Structure-activity relationships and discovery of a G protein biased  $\mu$  opioid receptor ligand, [(3-methoxythiophen-2-yl)methyl]({2-[(9R)-9-(pyridin-2-yl)-6-oxaspiro-[4.5]decan-9-yl]ethyl})amine (TRV130), for the treatment of acute severe pain. *J Med Chem*. 2013;56(20):8019-31. doi: 10.1021/jm4010829.
13. Manglik A, Lin H, Aryal DK, McCorvy JD, Dengler D, Corder G, et al. Structure-based discovery of opioid analgesics with reduced side effects. *Nature*. 2016;537(7619):185-90. doi: 10.1038/nature19112.
14. Schmid CL, Kennedy NM, Ross NC, Lovell KM, Yue Z, Morgenweck J, et al. Bias Factor and Therapeutic Window Correlate to Predict Safer Opioid Analgesics. *Cell*. 2017;171(5):1165-75 e13. Epub 2017/11/18. doi: 10.1016/j.cell.2017.10.035. PubMed PMID: 29149605; PubMed Central PMCID: PMC5731250.
15. Hertz S. Overview of the October 11, 2018 AADPAC Meeting to Discuss NDA 210730. In: Research FCFDEa, Division of Anesthesia A, and Addiction Productions, editors. 2018.
16. Hill R, Disney A, Conibear A, Sutcliffe K, Dewey W, Husbands S, et al. The novel  $\mu$ -opioid receptor agonist PZM21 depresses respiration and induces tolerance to antinociception. *Br J Pharmacol*. 2018;175(13):2653-61. doi: 10.1111/bph.14224.
17. Dickson BM. Approaching a parameter-free metadynamics. *Phys Rev E Stat Nonlin Soft Matter Phys*. 2011;84(3 Pt 2):037701. Epub 2011/11/09. doi: 10.1103/PhysRevE.84.037701. PubMed PMID: 22060542.
18. Katritch V, Cherezov V, Stevens RC. Structure-function of the G protein-coupled receptor superfamily. *Annu Rev Pharmacol Toxicol*. 2013;53:531-56. Epub 2012/11/13. doi: 10.1146/annurev-pharmtox-032112-135923. PubMed PMID: 23140243; PubMed Central PMCID: PMC3540149.
19. Dickson BM, de Waal PW, Ramjan ZH, Xu HE, Rothbart SB. A fast, open source implementation of adaptive biasing potentials uncovers a ligand design strategy for the chromatin regulator BRD4. *J Chem Phys*. 2016;145(15):154113. doi: 10.1063/1.4964776.
20. Dickson BM. Overfill Protection and Hyperdynamics in Adaptively Biased Simulations. *J Chem Theory Comput*. 2017;13(12):5925-32. doi: 10.1021/acs.jctc.7b00821.
21. Salomon-Ferrer R, Götz AW, Poole D, Le Grand S, Walker RC. Routine Microsecond Molecular Dynamics Simulations with AMBER on GPUs. 2. Explicit Solvent Particle Mesh Ewald. *J Chem Theory Comput*. 2013;9(9):3878-88. doi: 10.1021/ct400314y.
22. Case DA, Betz RM, Cerutti DS, III TEC, Darden TA, Duke RE, et al. AMBER16. University of California, San Francisco 2016.
23. Tribello GA, Bonomi M, Branduardi D, Camilloni C, Bussi G. PLUMED 2: New feathers for an old bird. *Computer Physics Communications*. 2014;185(2):604-13.
24. Cherezov V, Rosenbaum DM, Hanson MA, Rasmussen SG, Thian FS, Kobilka TS, et al. High-resolution crystal structure of an engineered human beta2-adrenergic G protein-coupled receptor. *Science*. 2007;318(5854):1258-65. Epub 2007/10/27. doi: 10.1126/science.1150577. PubMed PMID: 17962520; PubMed Central PMCID: PMC5731250.

25. Dror RO, Pan AC, Arlow DH, Borhani DW, Maragakis P, Shan Y, et al. Pathway and mechanism of drug binding to G-protein-coupled receptors. *PNAS*. 2011;108(32):13118-23. doi: 10.1073/pnas.1104614108.
26. Neilan CL, Husbands SM, Breeden S, Ko MC, Aceto MD, Lewis JW, et al. Characterization of the complex morphinan derivative BU72 as a high efficacy, long-lasting mu-opioid receptor agonist. *Eur J Pharmacol*. 2004;499(1-2):107-16. Epub 2004/09/15. doi: 10.1016/j.ejphar.2004.07.097. PubMed PMID: 15363957.
27. Manglik A, Kruse AC, Kobilka TS, Thian FS, Mathiesen JM, Sunahara RK, et al. Crystal structure of the micro-opioid receptor bound to a morphinan antagonist. *Nature*. 2012;485(7398):321-6. Epub 2012/03/23. doi: 10.1038/nature10954. PubMed PMID: 22437502; PubMed Central PMCID: PMC3523197.
28. Huang W, Manglik A, Venkatakrishnan AJ, Laeremans T, Feinberg EN, Sanborn AL, et al. Structural insights into  $\mu$ -opioid receptor activation. *Nature*. 2015;524(7565):315-21. doi: 10.1038/nature14886.
29. Vardanyan RS, Hruby VJ. Fentanyl-related compounds and derivatives: current status and future prospects for pharmaceutical applications. *Future Med Chem*. 2014;6(4):385-412. doi: 10.4155/fmc.13.215.
30. Maguire P, Tsai N, Kamal J, Cometta-Morini C, Upton C, Loew G. Pharmacological profiles of fentanyl analogs at mu, delta and kappa opiate receptors. *Eur J Pharmacol*. 1992;213(2):219-25.
31. Vucković S, Prostran M, Ivanović M, Dosen-Mičević L, Todorović Z, Nesić Z, et al. Fentanyl analogs: structure-activity-relationship study. *Curr Med Chem*. 2009;16(19):2468-74.
32. Li S, Cohen-Karni D, Kovaliov M, Tomycz N, Cheng B, Whiting D, et al. Synthesis and biological evaluation of fentanyl acrylic derivatives. *RSC Advances*. 2017;7(32):20015-9. doi: 10.1039/C7RA01346A.
33. Petrov RR, Vardanyan RS, Lee YS, Ma S-w, Davis P, Begay LJ, et al. Synthesis and evaluation of 3-aminopropionyl substituted fentanyl analogues for opioid activity. *Bioorg Med Chem Lett*. 2006;16(18):4946-50. doi: 10.1016/j.bmcl.2006.06.040.
34. Berger JG, Davidson F, Langford GE. Synthesis of some conformationally restricted analogs of fentanyl. *J Med Chem*. 1977;20(4):600-2. doi: 10.1021/jm00214a035.
35. Vardanyan R, Vijay G, Nichol GS, Liu L, Kumarasinghe I, Davis P, et al. Synthesis and investigations of double-pharmacophore ligands for treatment of chronic and neuropathic pain. *Bioorg Med Chem*. 2009;17(14):5044-53. doi: 10.1016/j.bmc.2009.05.065.
36. Koehl A, Hu H, Maeda S, Zhang Y, Qu Q, Paggi JM, et al. Structure of the  $\mu$ -opioid receptor-Gi protein complex. *Nature*. 2018;558(7711):547-52. doi: 10.1038/s41586-018-0219-7.
37. Dixon AS, Schwinn MK, Hall MP, Zimmerman K, Otto P, Lubben TH, et al. NanoLuc Complementation Reporter Optimized for Accurate Measurement of Protein Interactions in Cells. *ACS Chem Biol*. 2016;11(2):400-8. doi: 10.1021/acschembio.5b00753.
38. Bernardi RC, Melo MCR, Schulten K. Enhanced Sampling Techniques in Molecular Dynamics Simulations of Biological Systems. *Biochim Biophys Acta*. 2015;1850(5):872-7. doi: 10.1016/j.bbagen.2014.10.019.
39. Spahn V, Del Vecchio G, Labuz D, Rodriguez-Gaztelumendi A, Massaly N, Temp J, et al. A nontoxic pain killer designed by modeling of pathological receptor conformations. *Science (New York, NY)*. 2017;355(6328):966-9. doi: 10.1126/science.aai8636.
40. Ellis CR, Kruhlak NL, Kim MT, Hawkins EG, Stavitskaya L. Predicting opioid receptor binding affinity of pharmacologically unclassified designer substances using molecular docking. *PLOS ONE*. 2018;13(5):e0197734. doi: 10.1371/journal.pone.0197734.
41. Subramanian G, Paterlini MG, Portoghese PS, Ferguson DM. Molecular Docking Reveals a Novel Binding Site Model for Fentanyl at the  $\mu$ -Opioid Receptor. *J Med Chem*. 2000;43(3):381-91. doi: 10.1021/jm9903702.
42. Mobley DL, Dill KA. Binding of Small-Molecule Ligands to Proteins: "What You See" Is Not Always "What You Get". *Structure*. 2009;17(4):489-98. doi: 10.1016/j.str.2009.02.010.
43. Stuckey JI, Dickson BM, Cheng N, Liu Y, Norris JL, Cholensky SH, et al. A cellular chemical probe targeting the chromodomains of Polycomb repressive complex 1. *Nat Chem Biol*. 2016;12(3):180-7. Epub 2016/01/26. doi: 10.1038/nchembio.2007. PubMed PMID: 26807715; PubMed Central PMCID: PMC3523197.

44. Michino M, Beuming T, Donthamsetti P, Newman AH, Javitch JA, Shi L. What can crystal structures of aminergic receptors tell us about designing subtype-selective ligands? *Pharmacol Rev*. 2015;67(1):198-213. doi: 10.1124/pr.114.009944.
45. Masureel M, Zou Y, Picard LP, van der Westhuizen E, Mahoney JP, Rodrigues J, et al. Structural insights into binding specificity, efficacy and bias of a beta2AR partial agonist. *Nat Chem Biol*. 2018;14(11):1059-66. Epub 2018/10/18. doi: 10.1038/s41589-018-0145-x. PubMed PMID: 30327561; PubMed Central PMCID: PMC6197491.
46. Wacker D, Wang S, McCorvy JD, Betz RM, Venkatakrisnan AJ, Levit A, et al. Crystal Structure of an LSD-Bound Human Serotonin Receptor. *Cell*. 2017;168(3):377-89 e12. Epub 2017/01/28. doi: 10.1016/j.cell.2016.12.033. PubMed PMID: 28129538; PubMed Central PMCID: PMC5289311.
47. Huang J, Rauscher S, Nawrocki G, Ran T, Feig M, Groot dBL, et al. CHARMM36m: An Improved Force Field for Folded and Intrinsically Disordered Proteins. *Nature methods*. 2017;14(1):71. doi: 10.1038/nmeth.4067.
48. Eswar N, Webb B, Marti-Renom MA, Madhusudhan MS, Eramian D, Shen M-y, et al. Comparative Protein Structure Modeling Using Modeller. *Curr Protoc Bioinformatics*. 2006;0 5:Unit-5.6. doi: 10.1002/0471250953.bi0506s15.
49. Dror RO, Arlow DH, Maragakis P, Mildorf TJ, Pan AC, Xu H, et al. Activation mechanism of the  $\beta$ 2-adrenergic receptor. *Proc Natl Acad Sci U S A*. 2011;108(46):18684-9. doi: 10.1073/pnas.1110499108.
50. Katritch V, Fenalti G, Abola EE, Roth BL, Cherezov V, Stevens RC. Allosteric sodium in class A GPCR signaling. *Trends Biochem Sci*. 2014;39(5):233-44. doi: 10.1016/j.tibs.2014.03.002.
51. Vanommeslaeghe K, Hatcher E, Acharya C, Kundu S, Zhong S, Shim J, et al. CHARMM General Force Field (CGenFF): A force field for drug-like molecules compatible with the CHARMM all-atom additive biological force fields. *J Comput Chem*. 2010;31(4):671-90. doi: 10.1002/jcc.21367.
52. Rodriguez A, Laio A. Clustering by fast search and find of density peaks. *Science*. 2014;344(6191):1492-6. doi: 10.1126/science.1242072.
53. Roe DR, Cheatham TE. PTRAJ and CPPTRAJ: Software for Processing and Analysis of Molecular Dynamics Trajectory Data. *J Chem Theory Comput*. 2013;9(7):3084-95. doi: 10.1021/ct400341p.
54. Allen WJ, Balus TE, Mukherjee S, Brozell SR, Moustakas DT, Lang PT, et al. DOCK 6: Impact of new features and current docking performance. *J Comput Chem*. 2015;36(15):1132-56. doi: 10.1002/jcc.23905.
55. Pettersen EF, Goddard TD, Huang CC, Couch GS, Greenblatt DM, Meng EC, et al. UCSF Chimera--a visualization system for exploratory research and analysis. *J Comput Chem*. 2004;25(13):1605-12. doi: 10.1002/jcc.20084.
56. Liu P, Jia M-Z, Zhou XE, De Waal PW, Dickson BM, Liu B, et al. The structural basis of the dominant negative phenotype of the Gai1 $\beta$ 1 $\gamma$ 2 G203A/A326S heterotrimer. *Acta Pharmacol Sin*. 2016;37(9):1259-72. doi: 10.1038/aps.2016.69.
57. Yin W, Zhou XE, Yang D, de Waal PW, Wang M, Dai A, et al. Crystal structure of the human 5-HT1B serotonin receptor bound to an inverse agonist. *Cell Discov*. 2018;4. doi: 10.1038/s41421-018-0009-2.

## Fig 1.

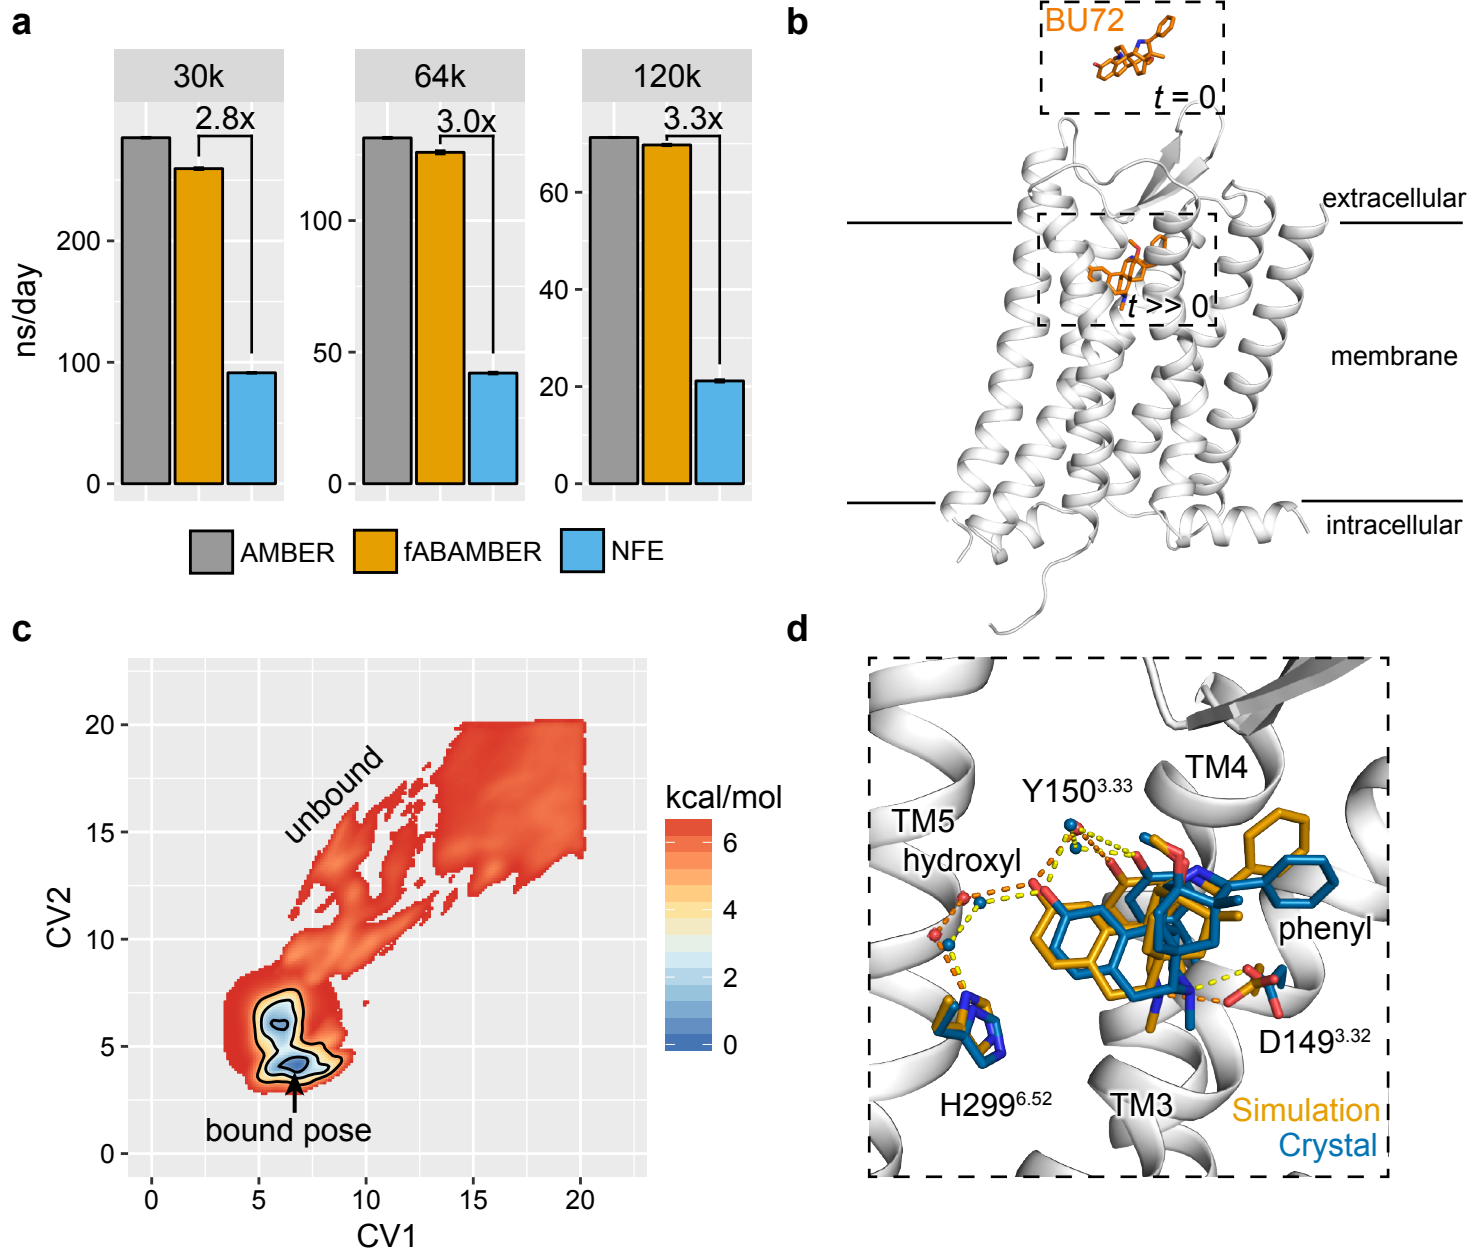

## Fig 2.

a

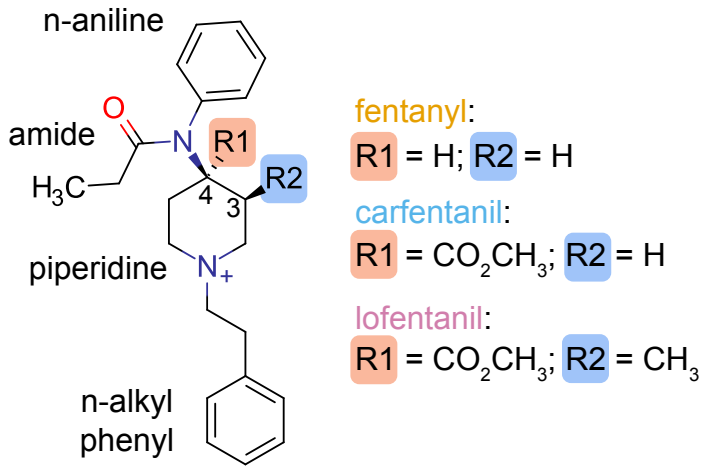

b

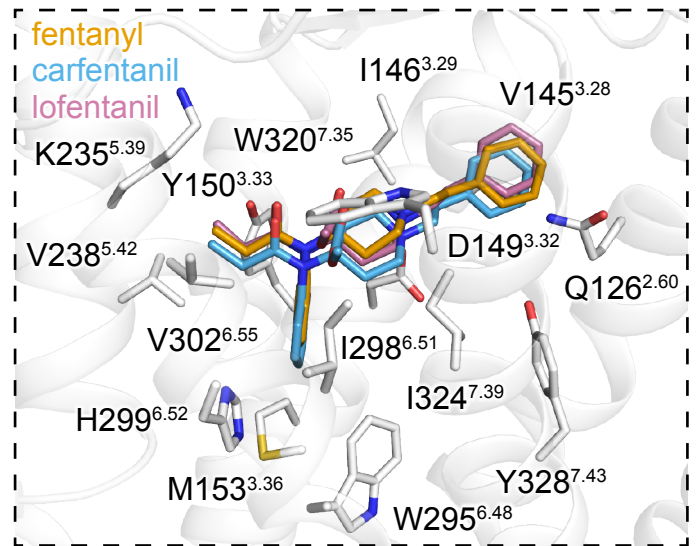

c

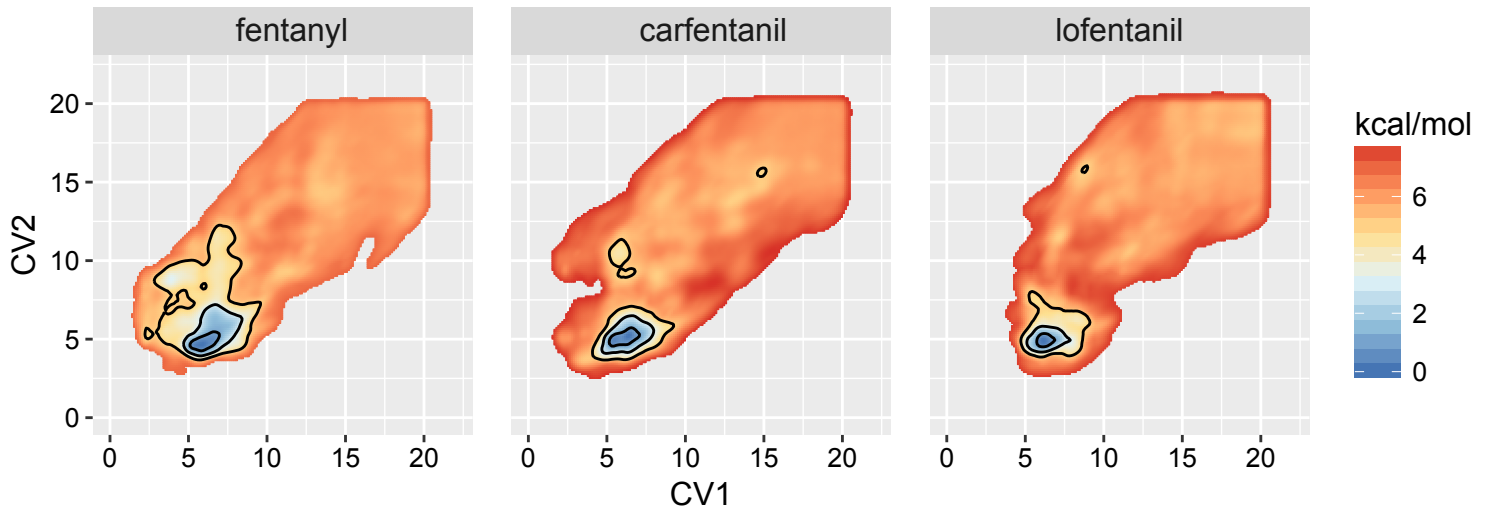

d

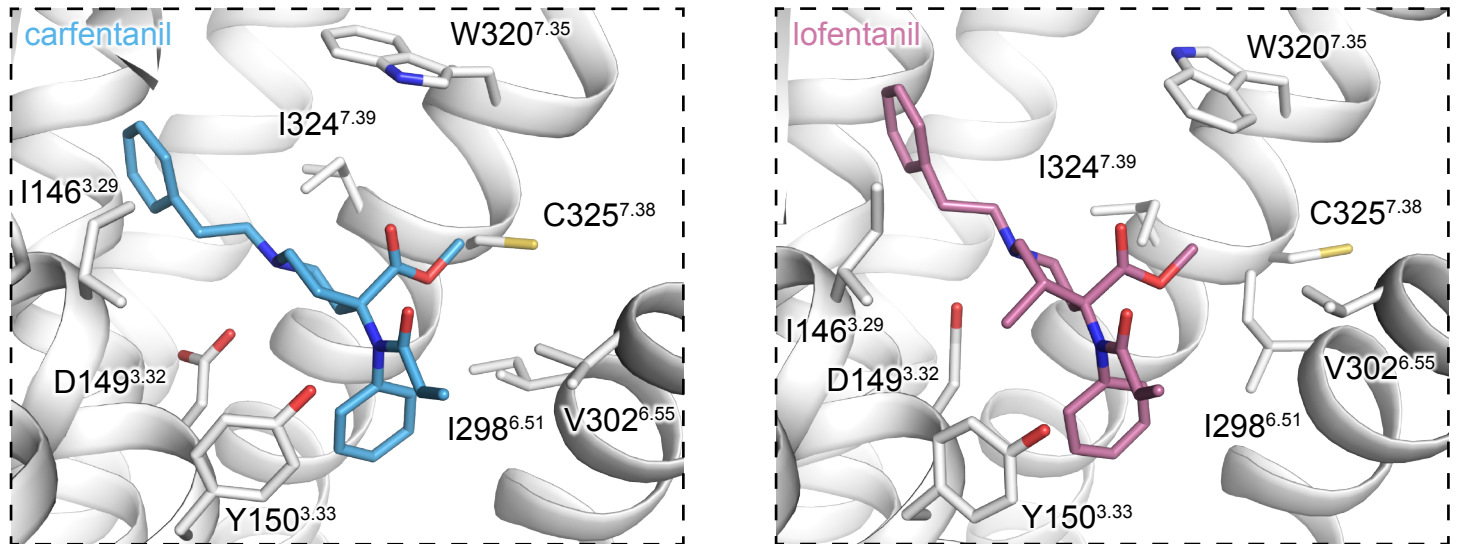



### Fig 3.

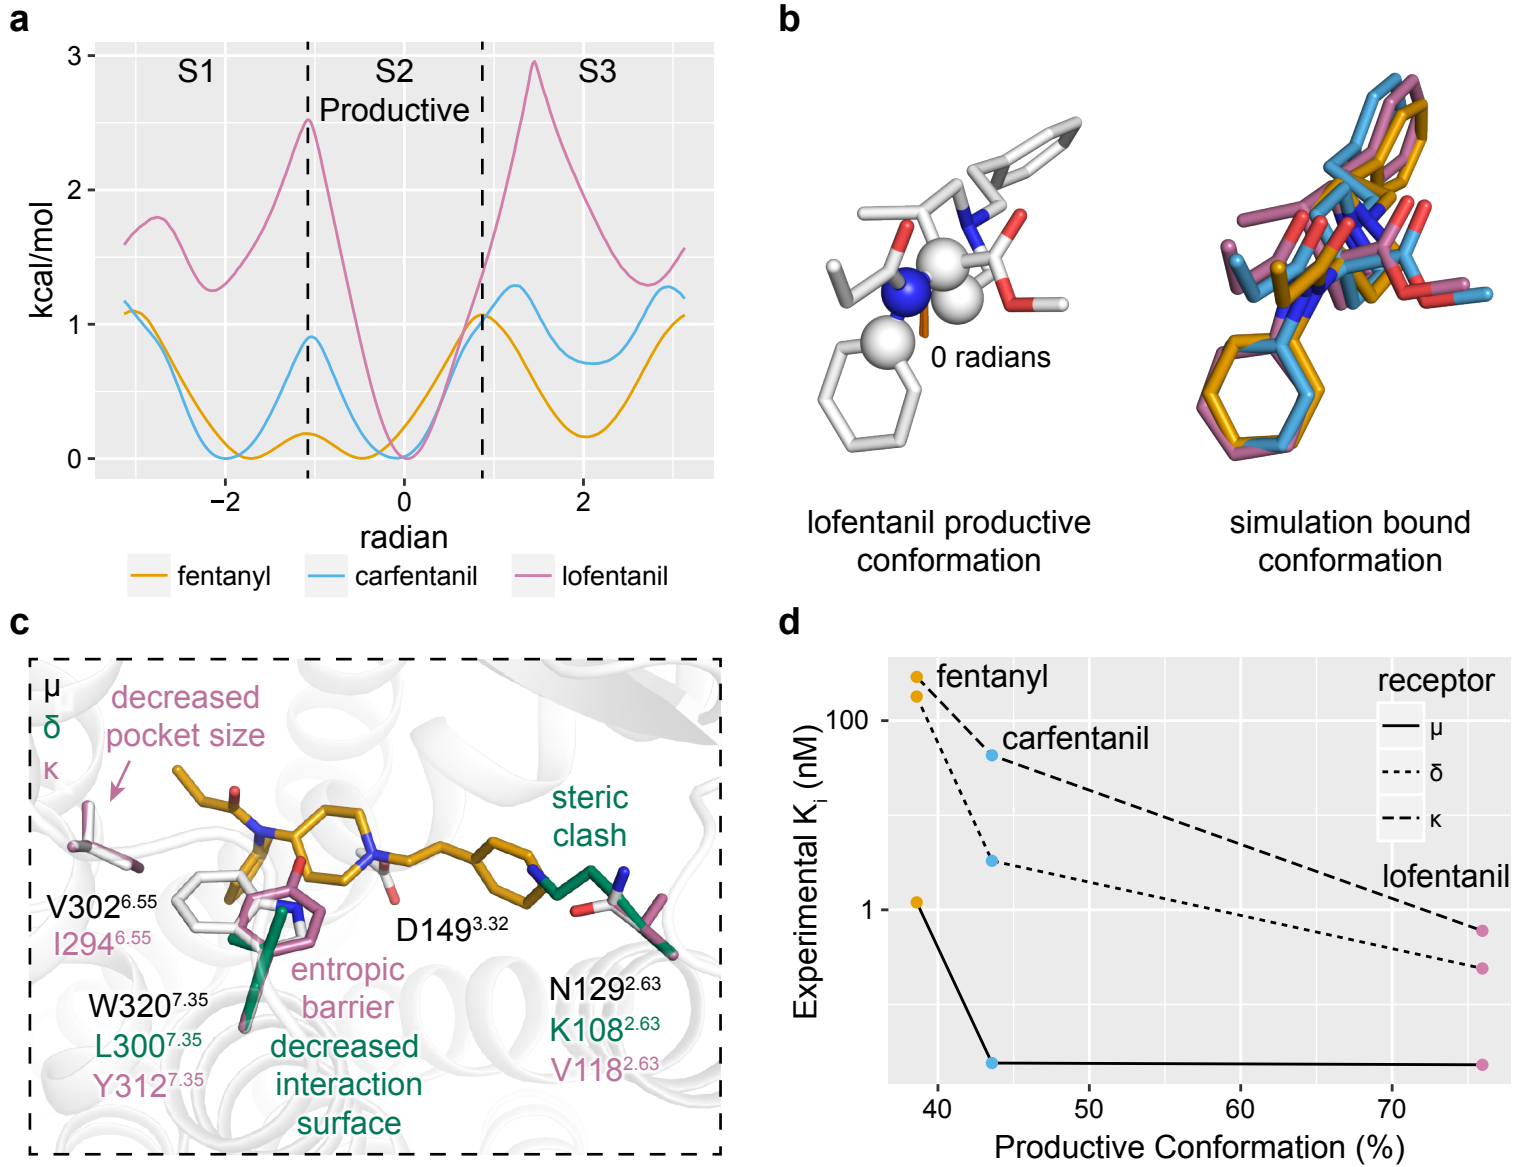

## Fig 4.

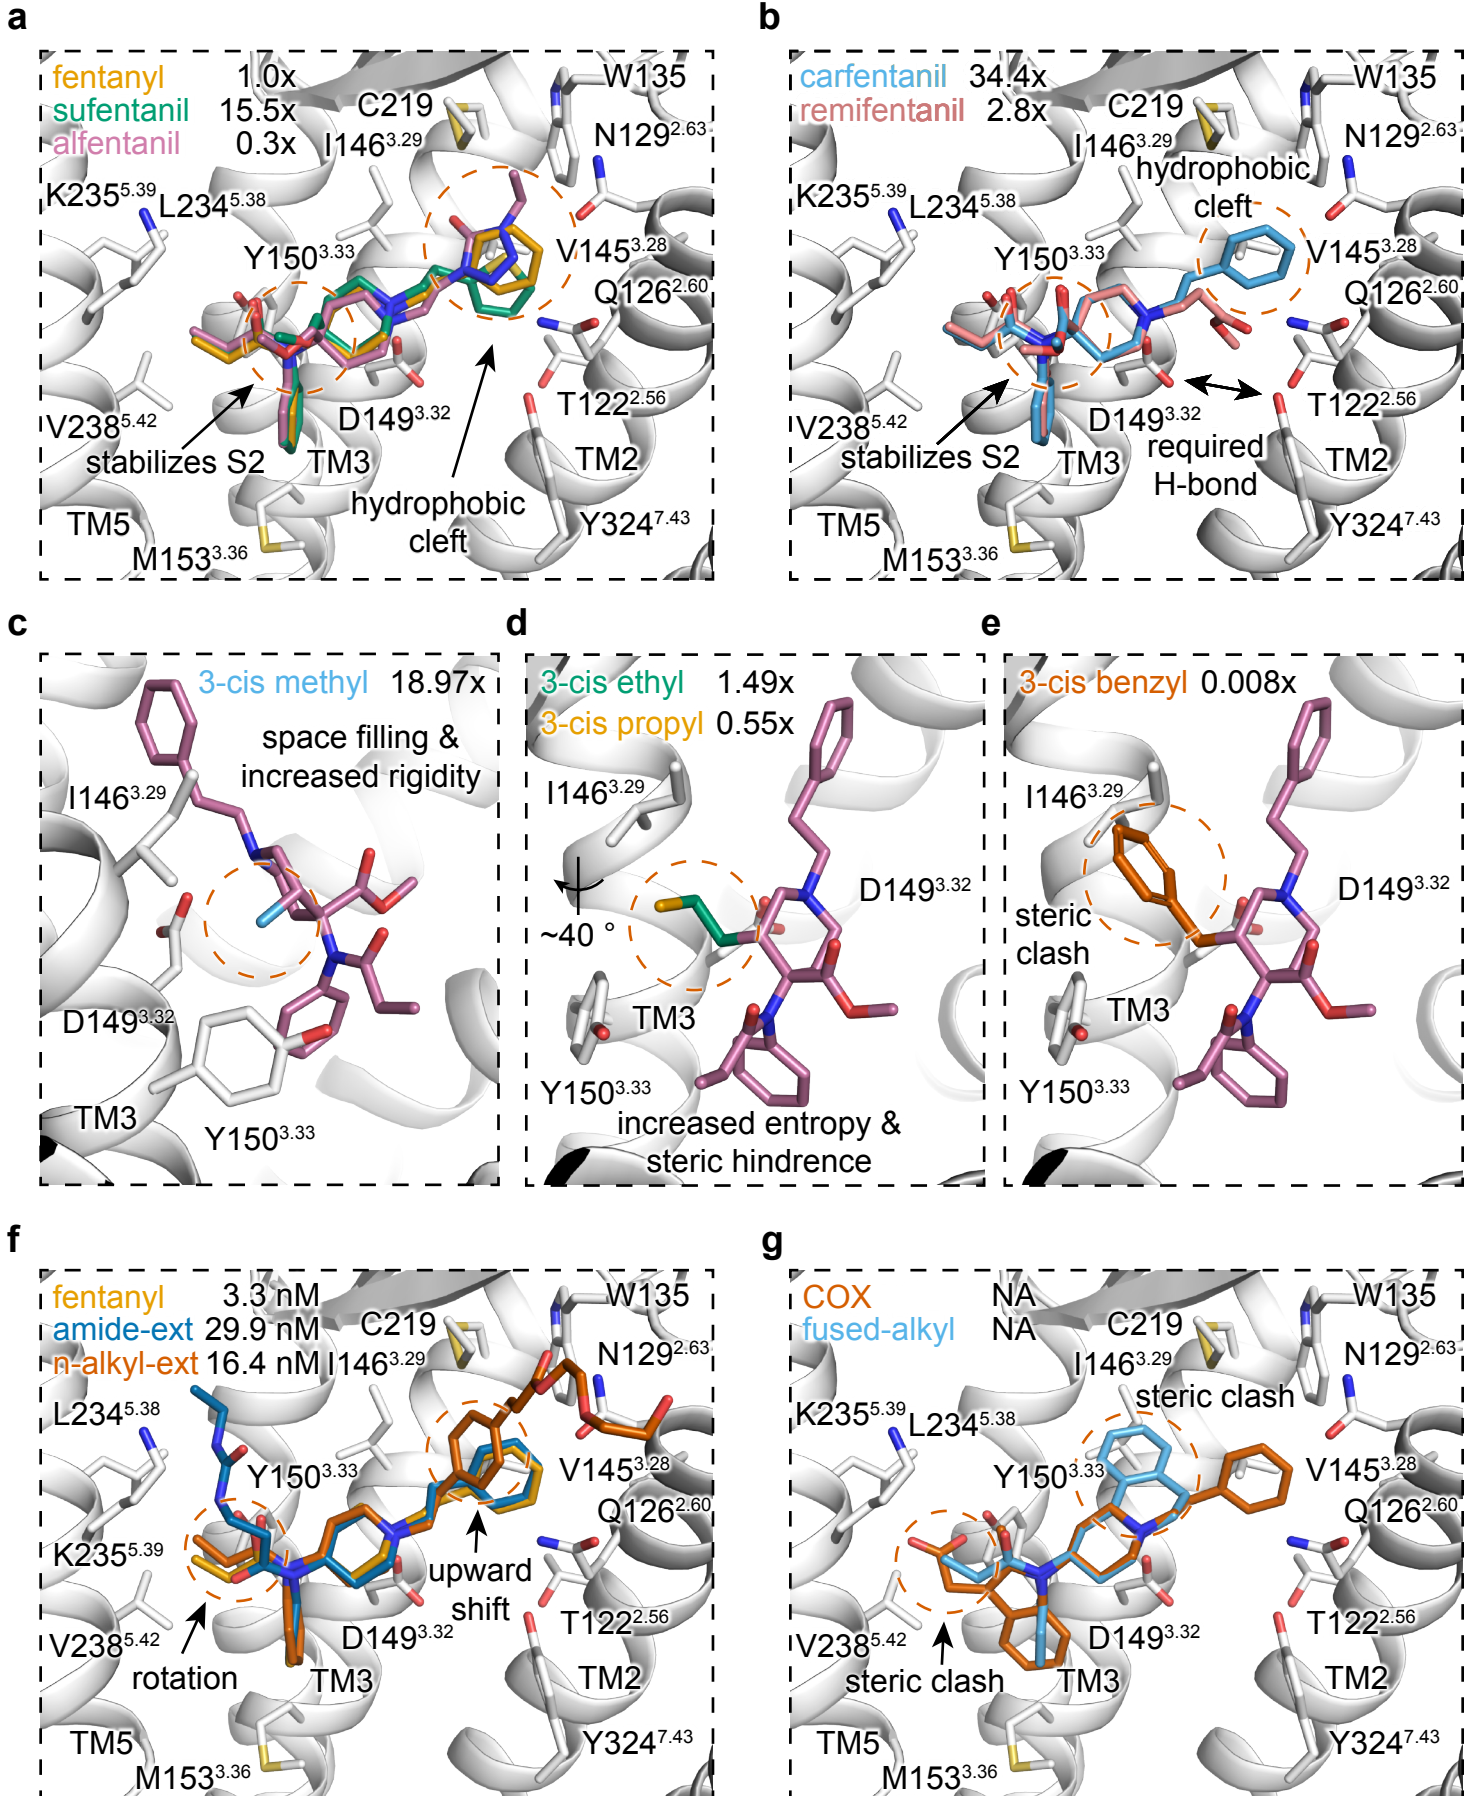

**Fig 5.**

**a**

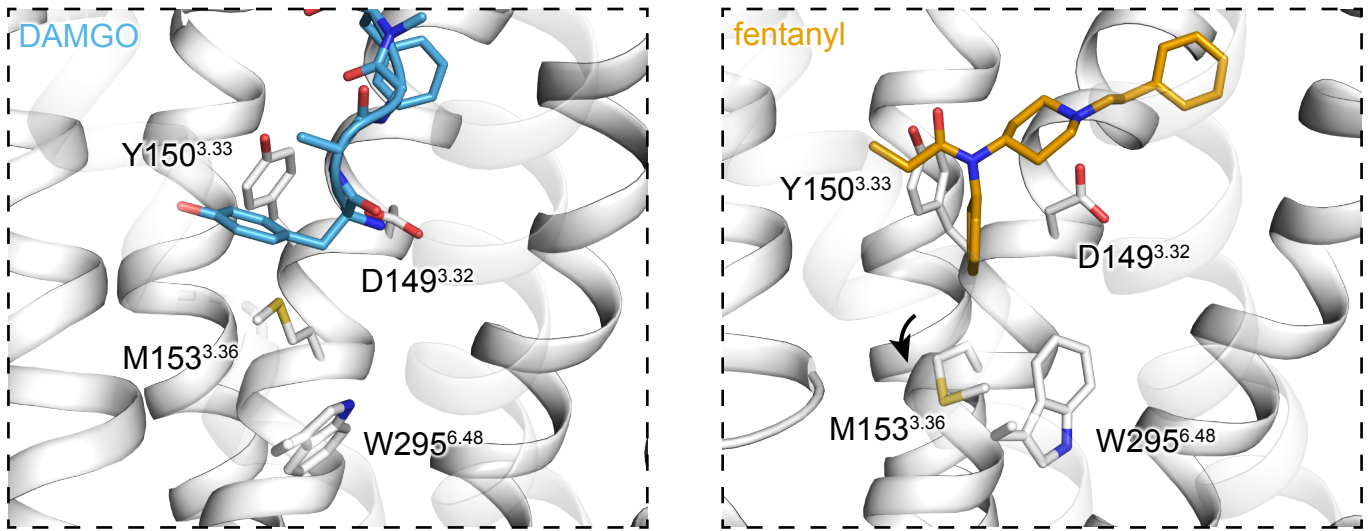

**b**

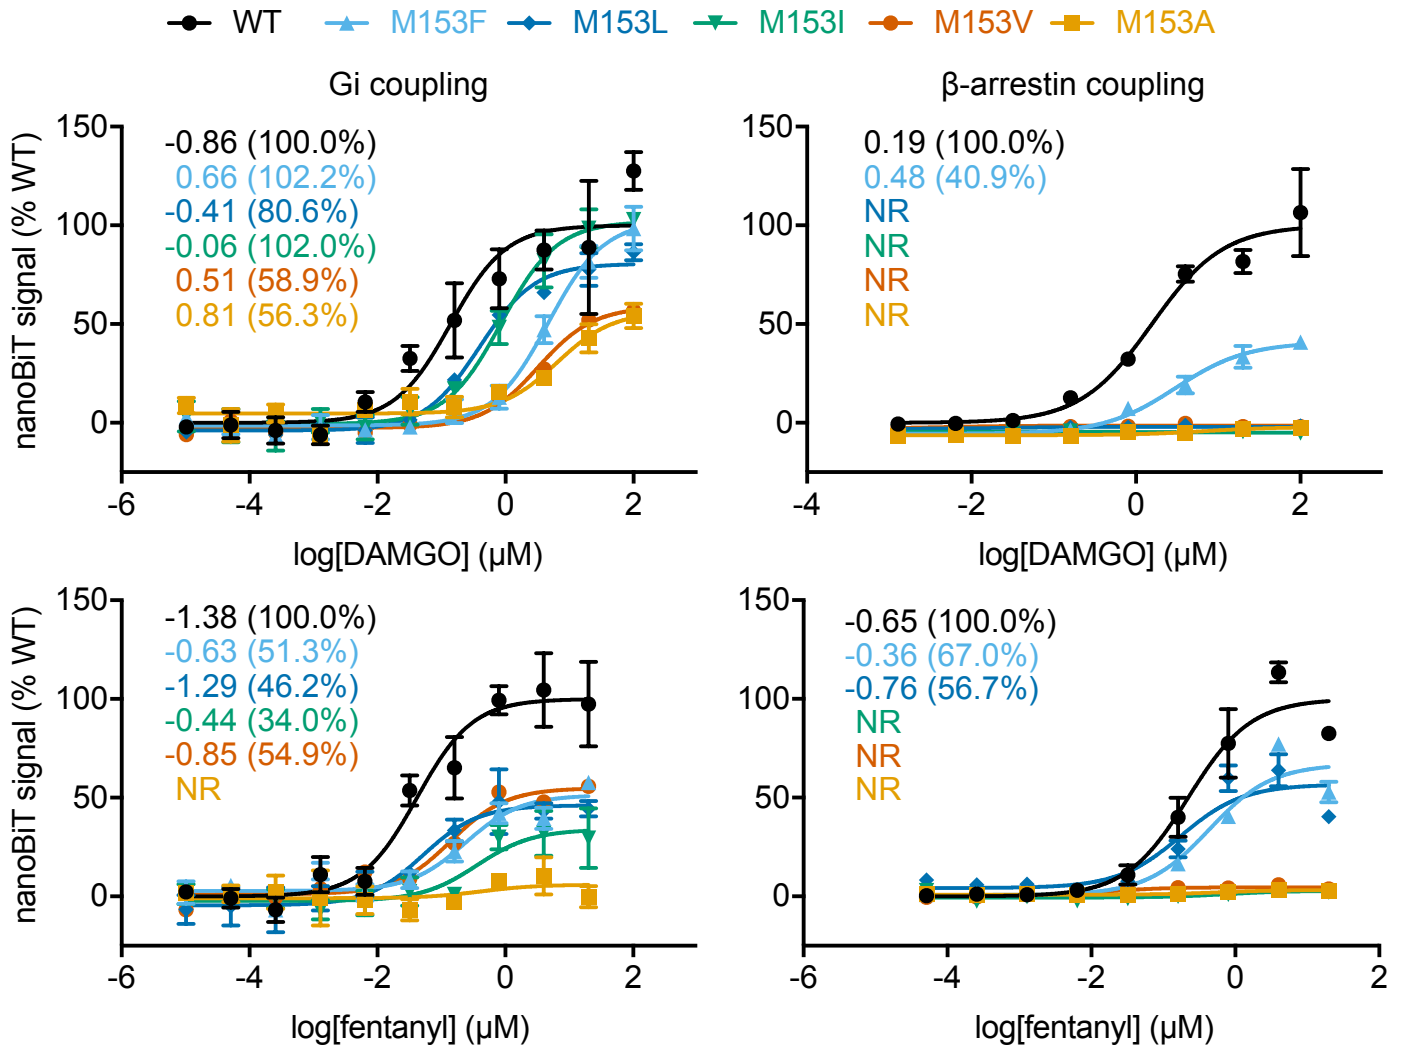

**Fig 6.**

**a**

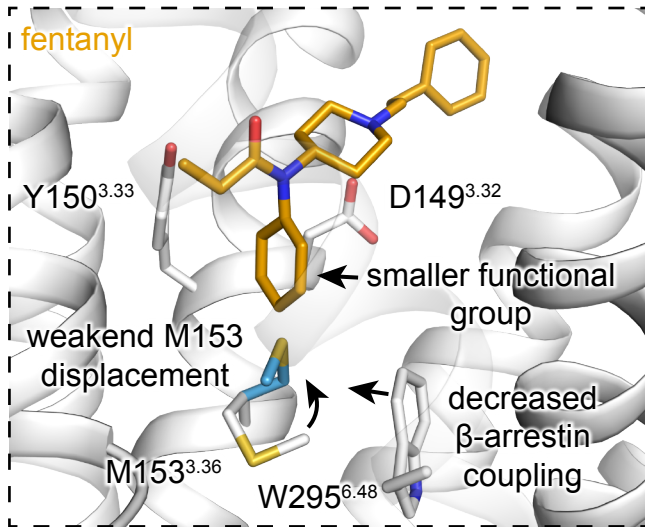

**b**

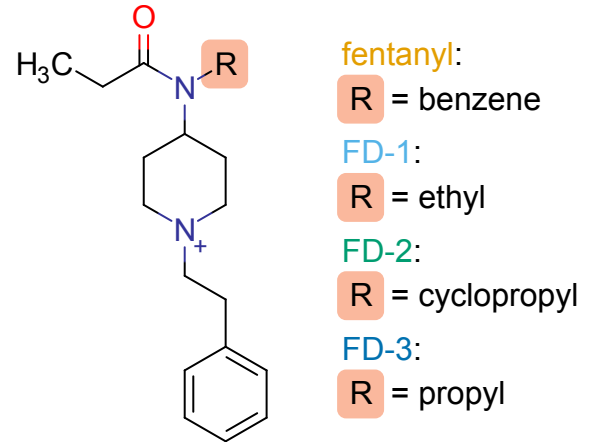

**c**

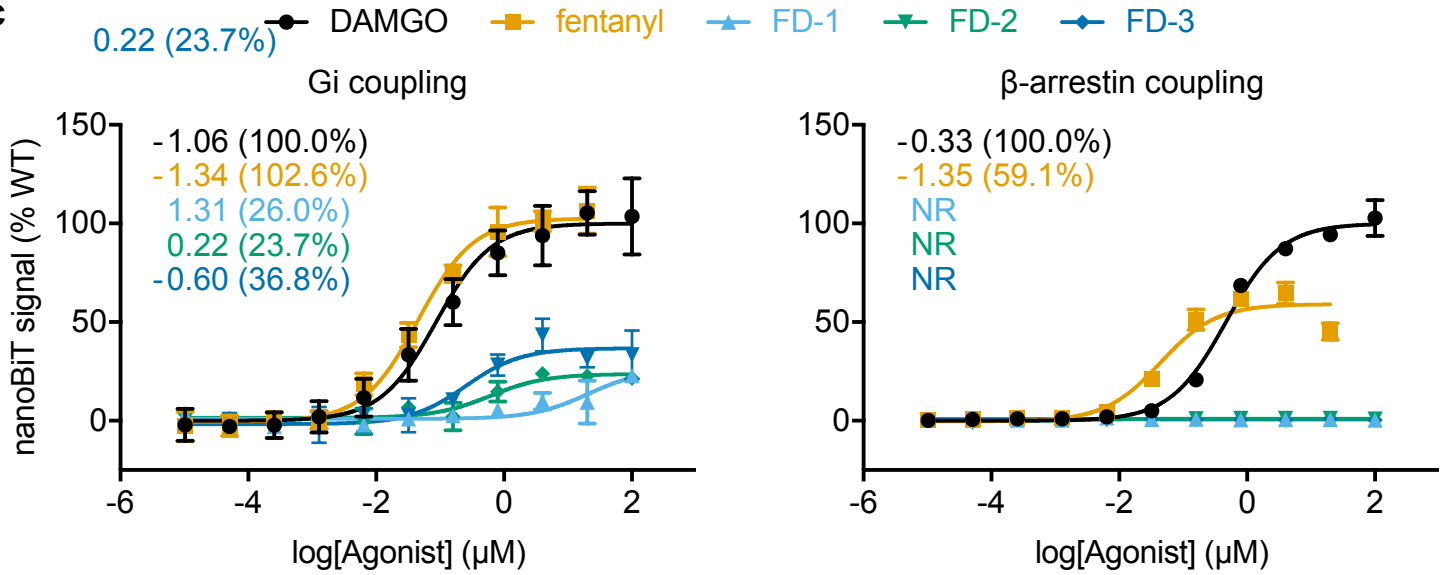

## Fig S1.

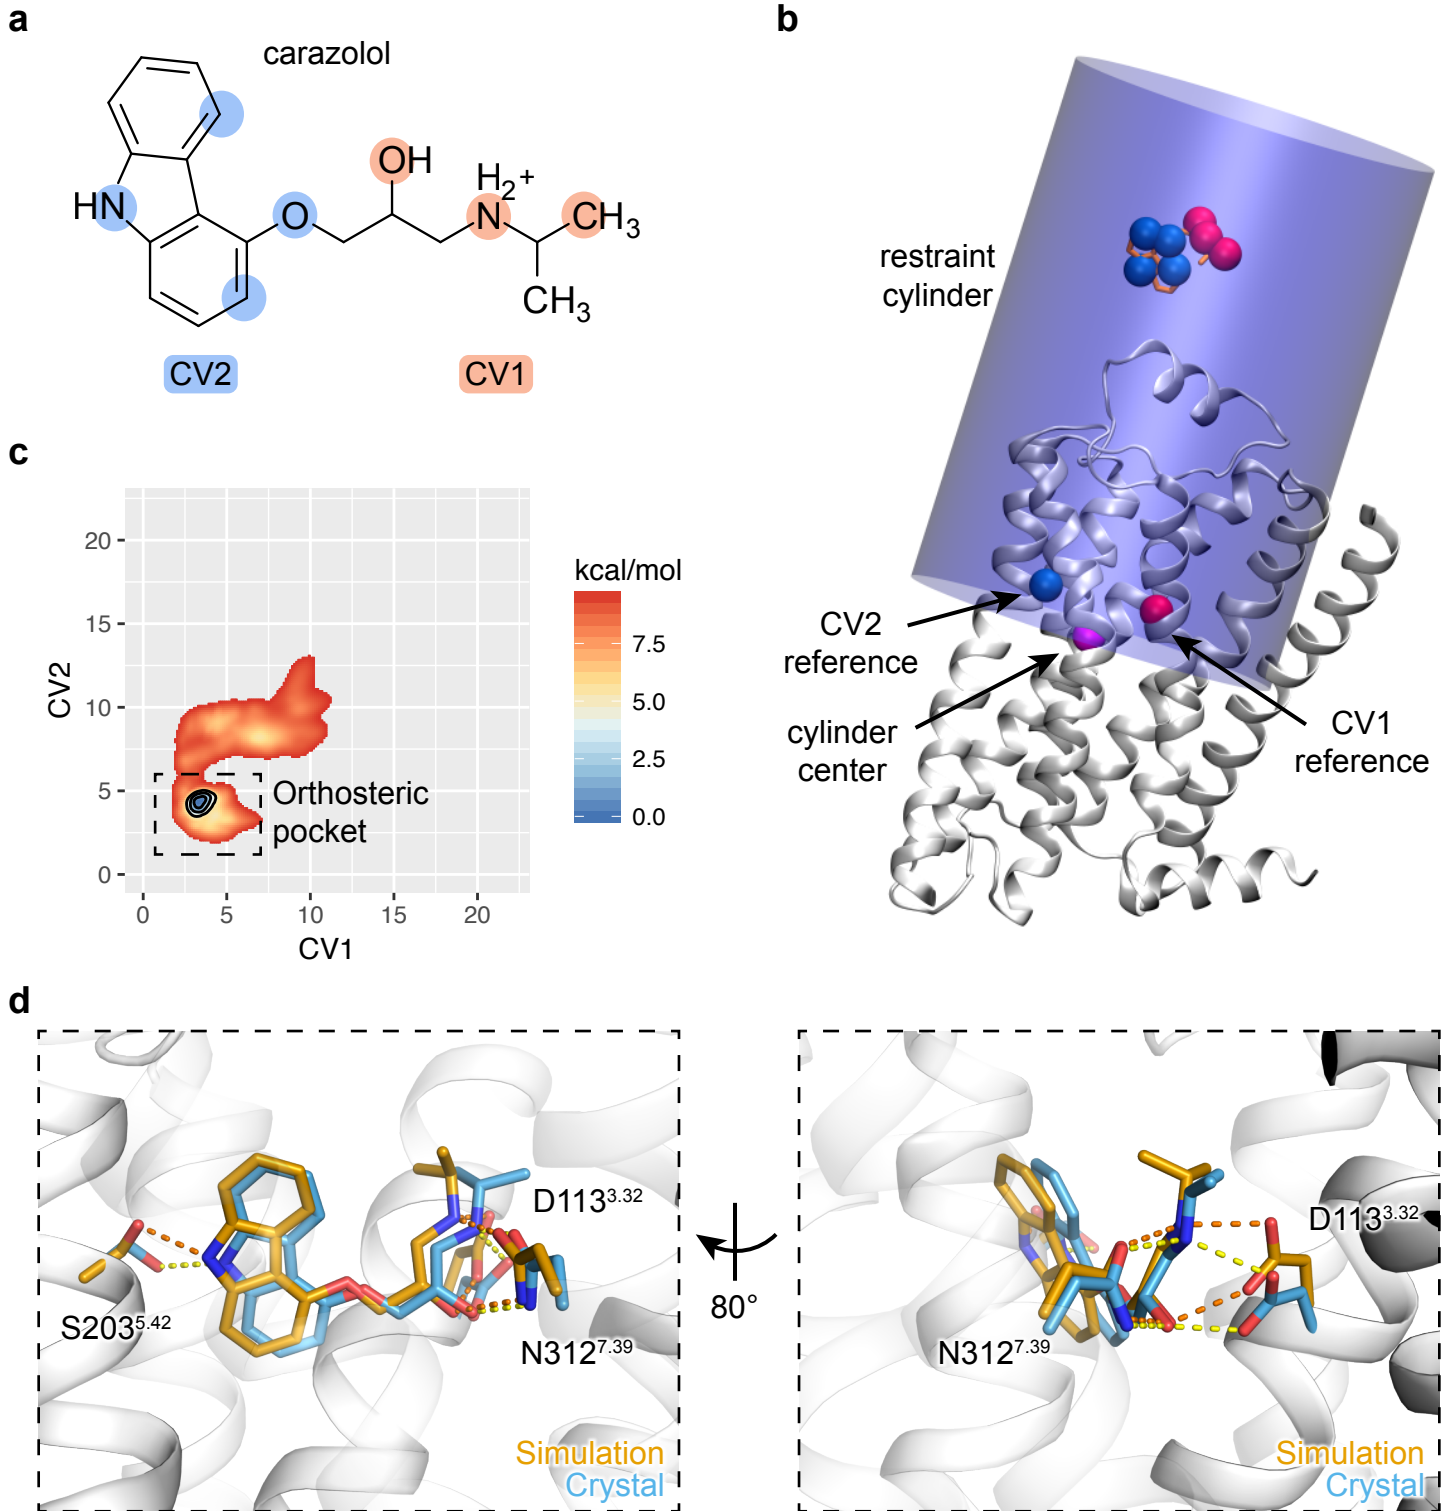

## Fig S2.

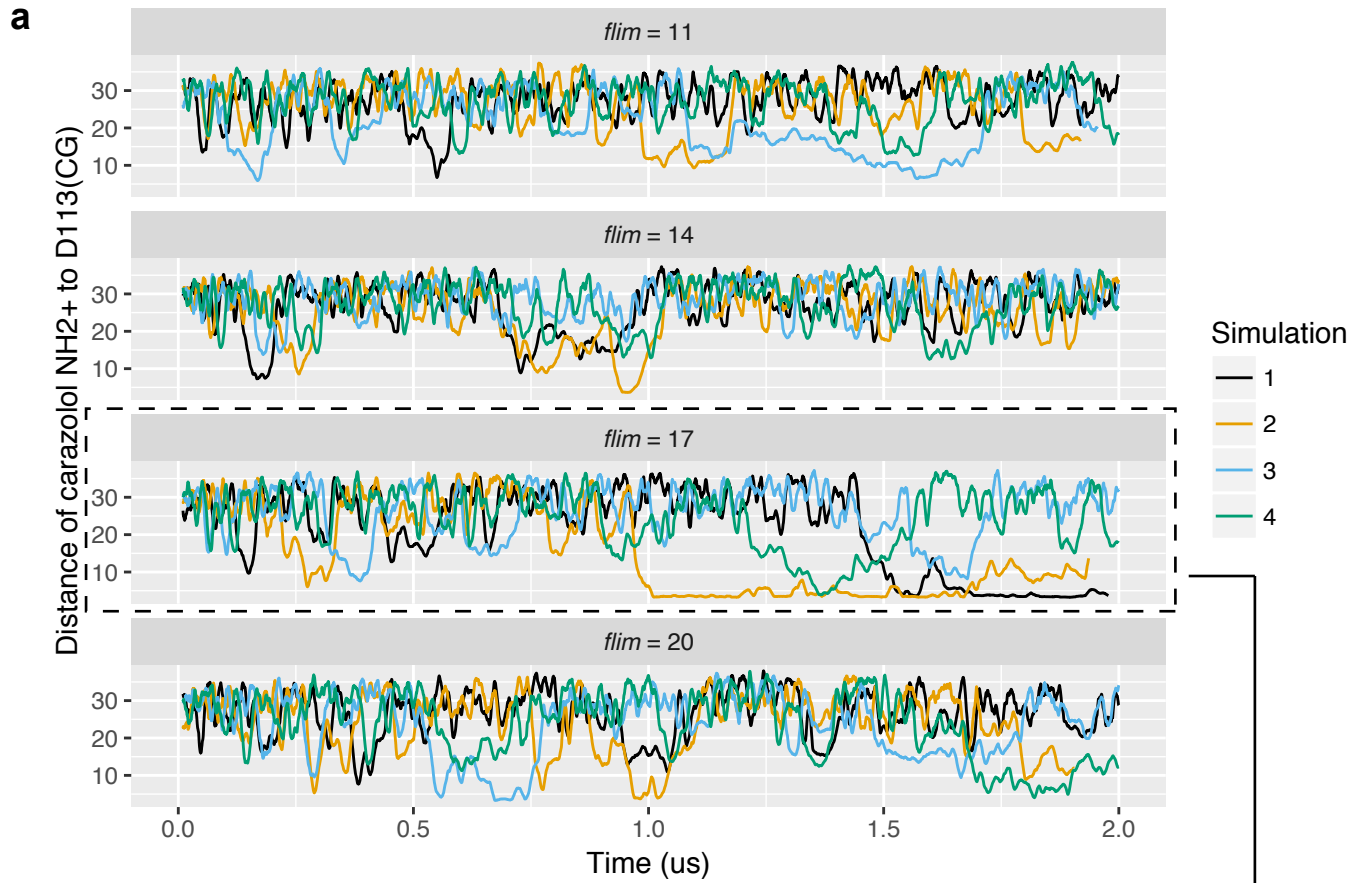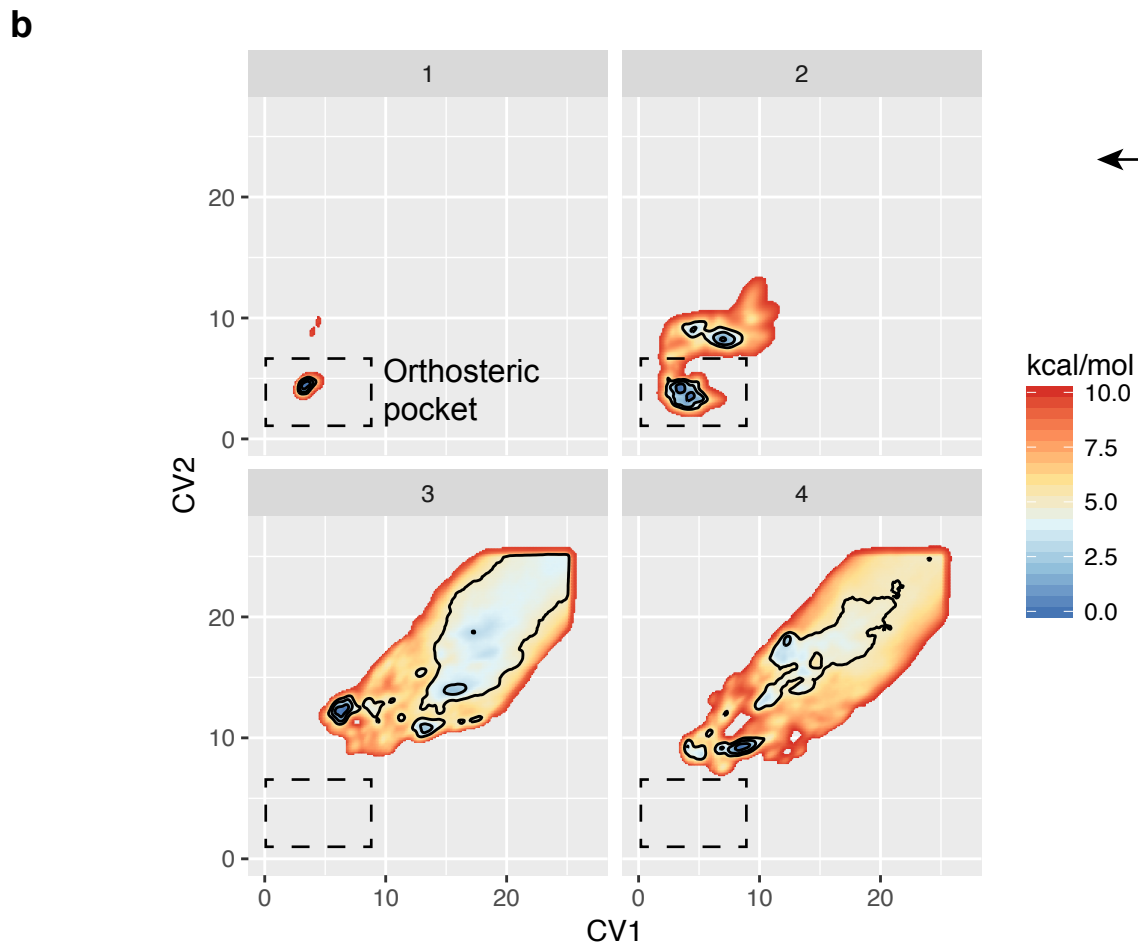

### Fig S3.

**a**

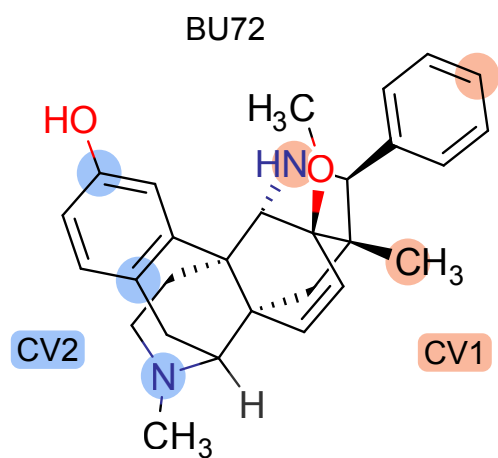

**b**

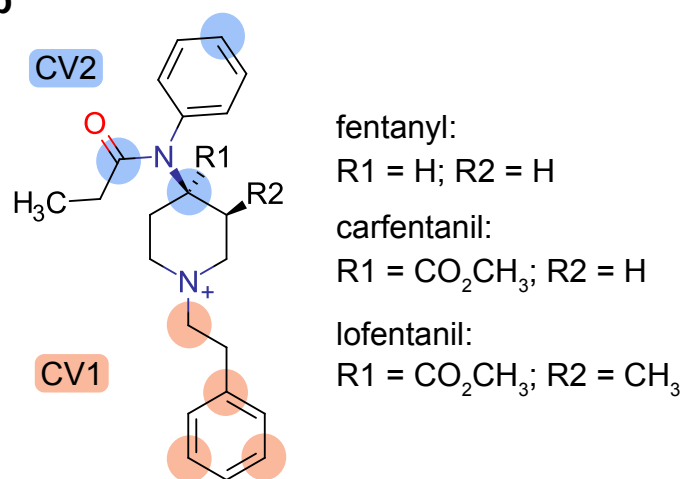

## Fig S4.

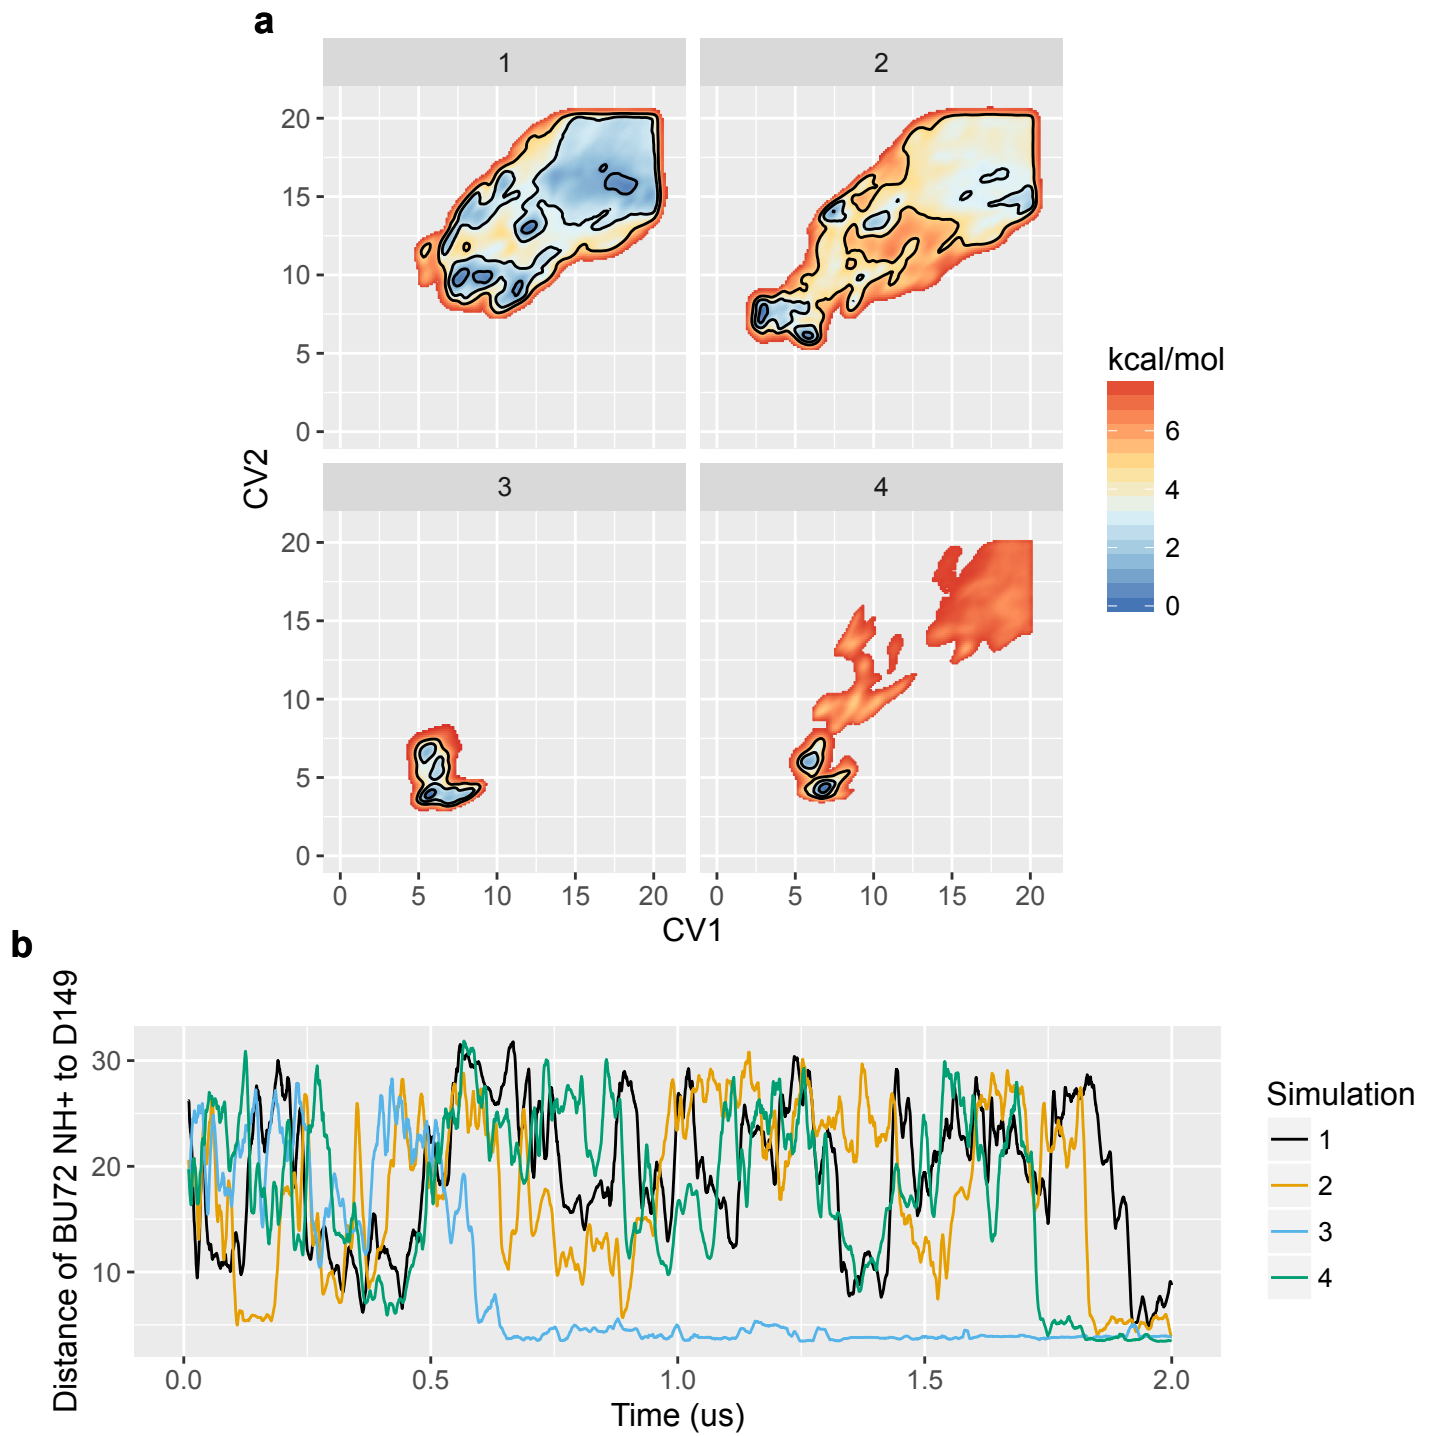



**Fig S5.**

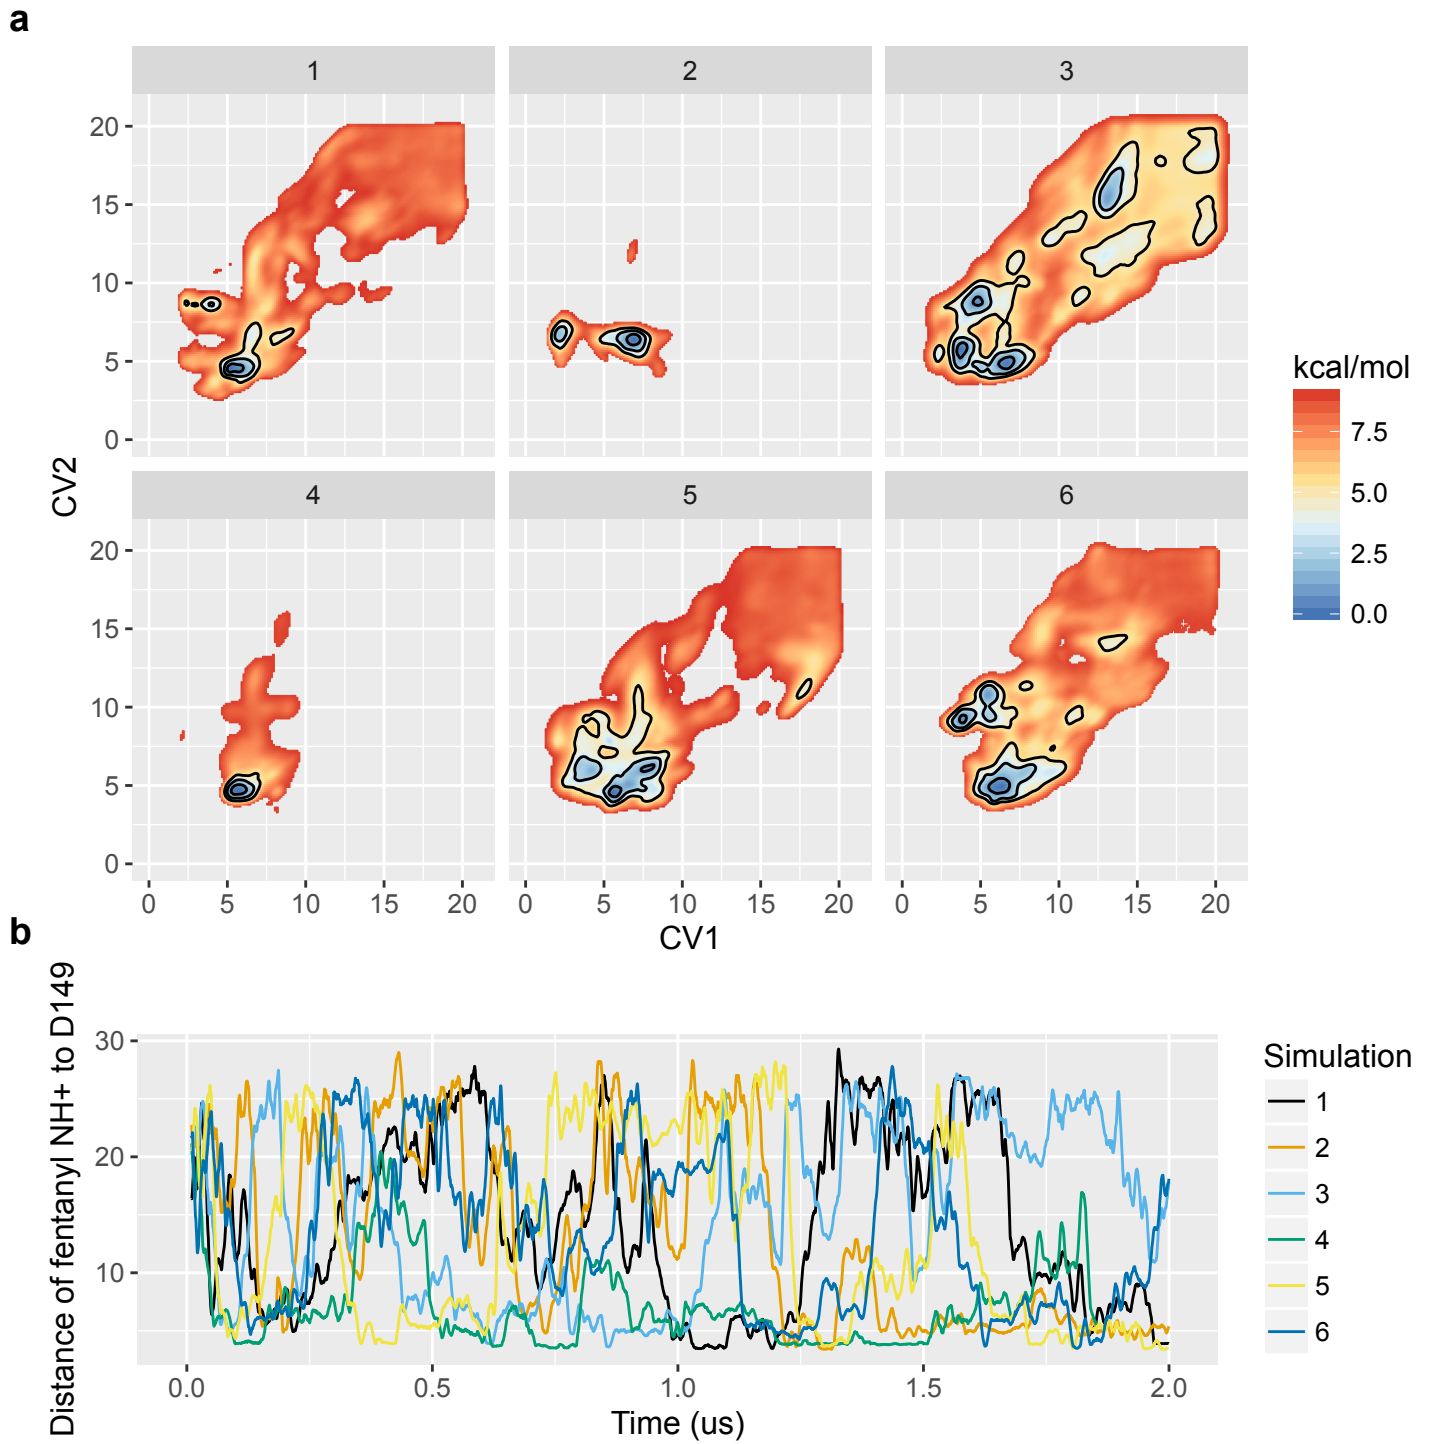

## Fig S6.

**a**

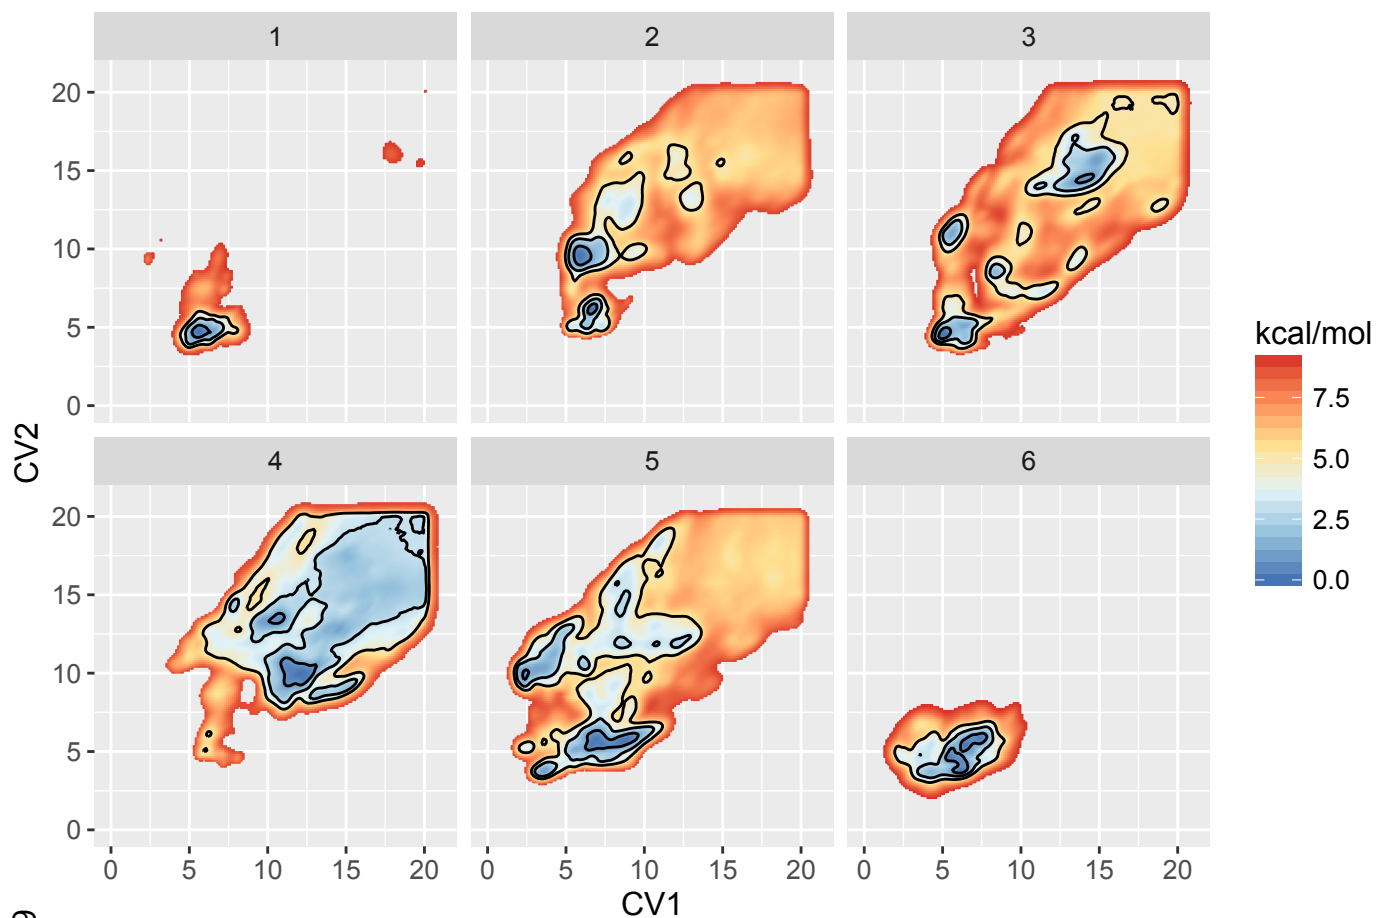

**b**

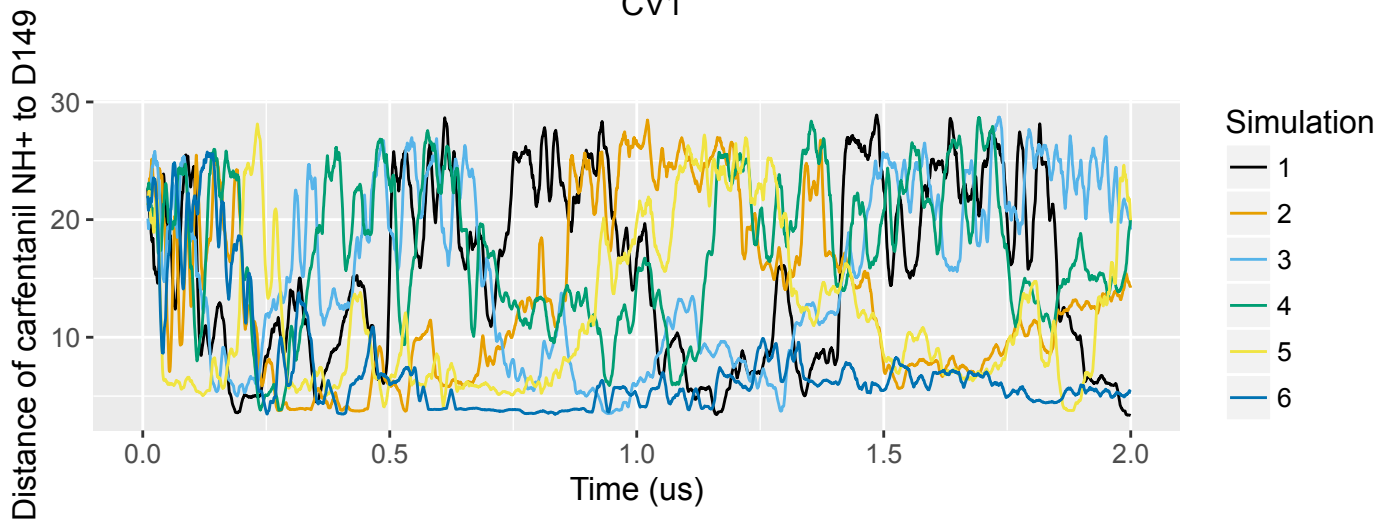

## Fig S7.

**a**

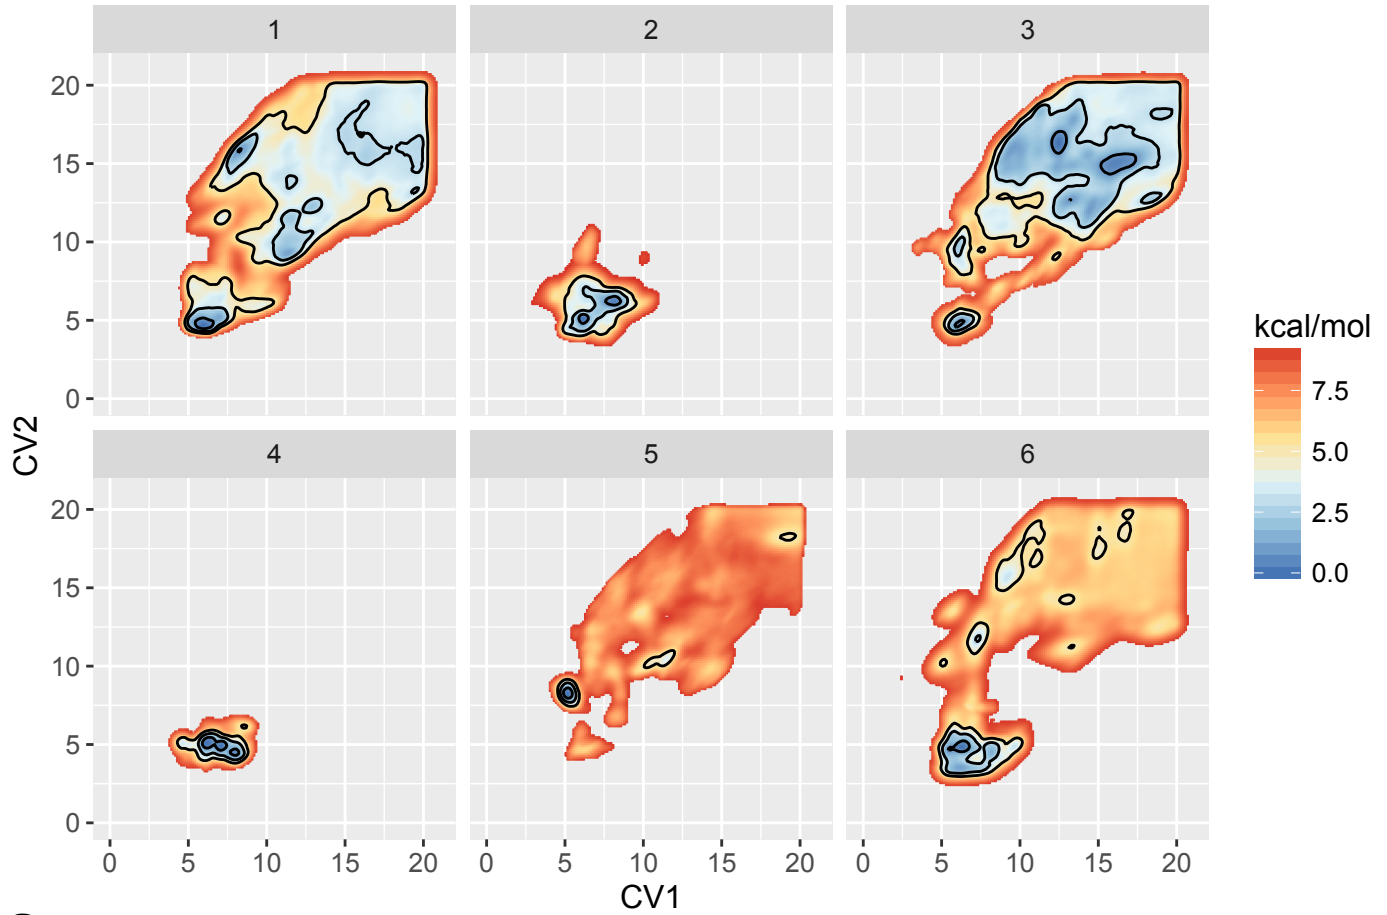

**b**

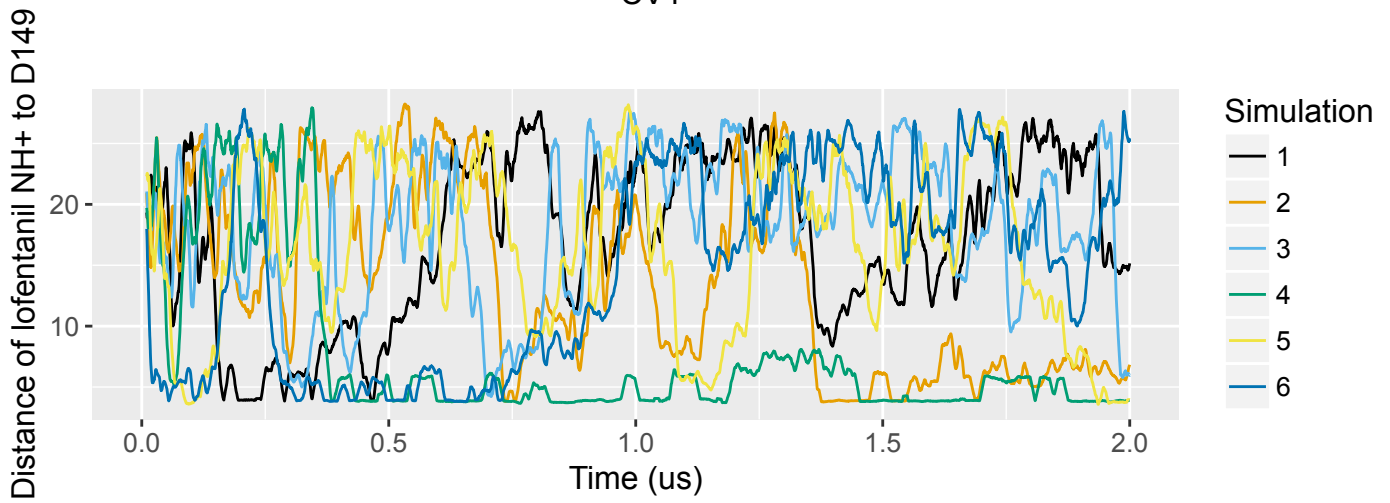

## Fig S8.

a

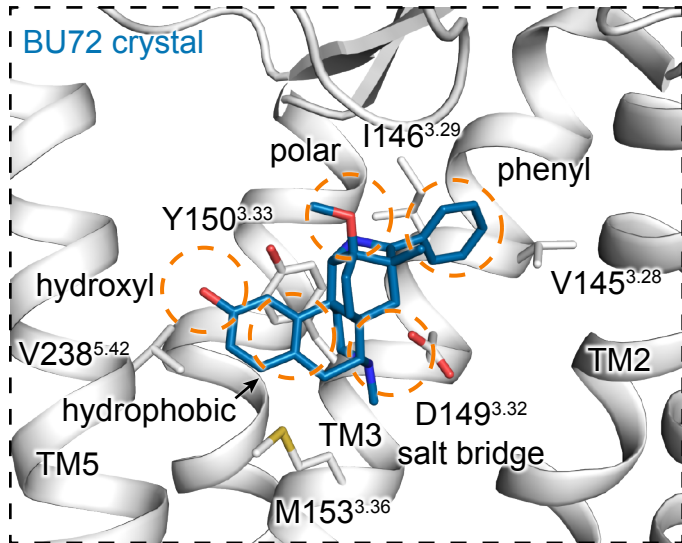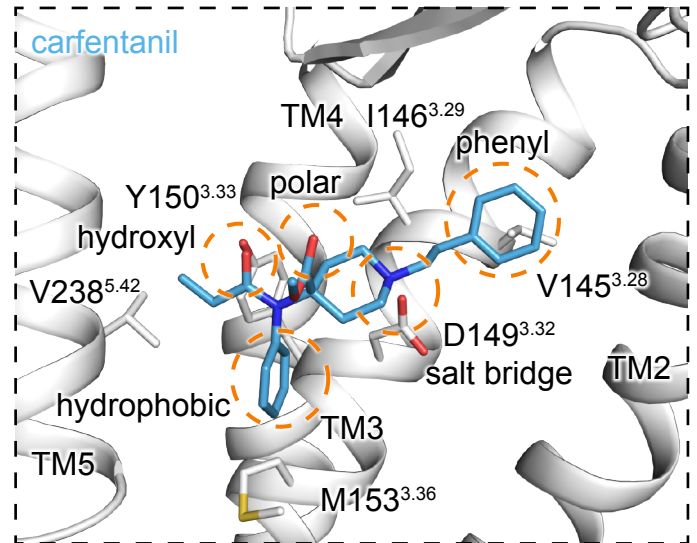

**Fig S9.**

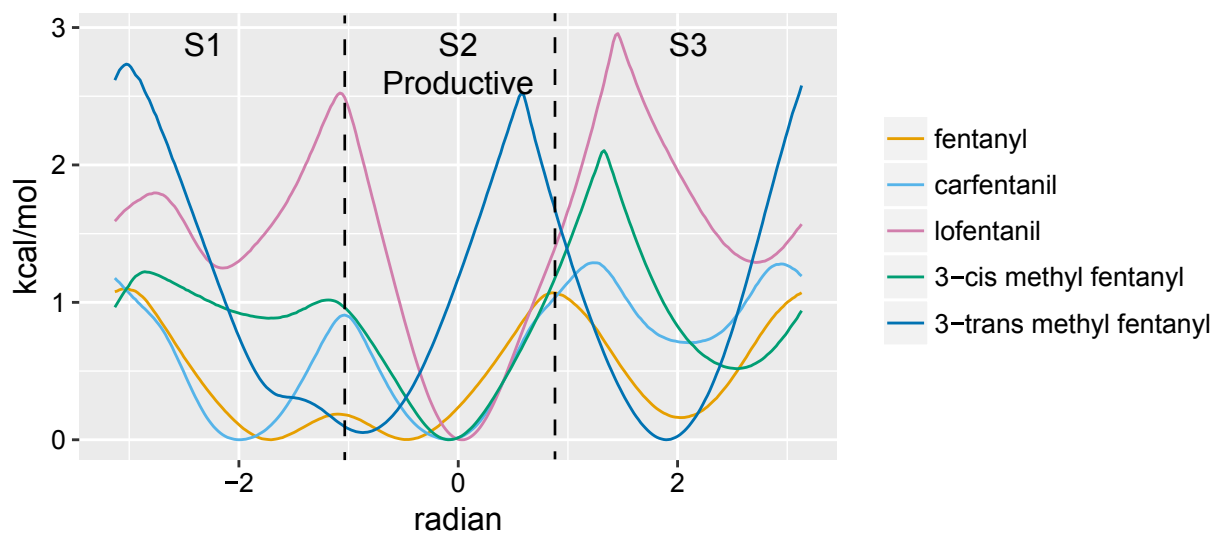

**Fig S10.**

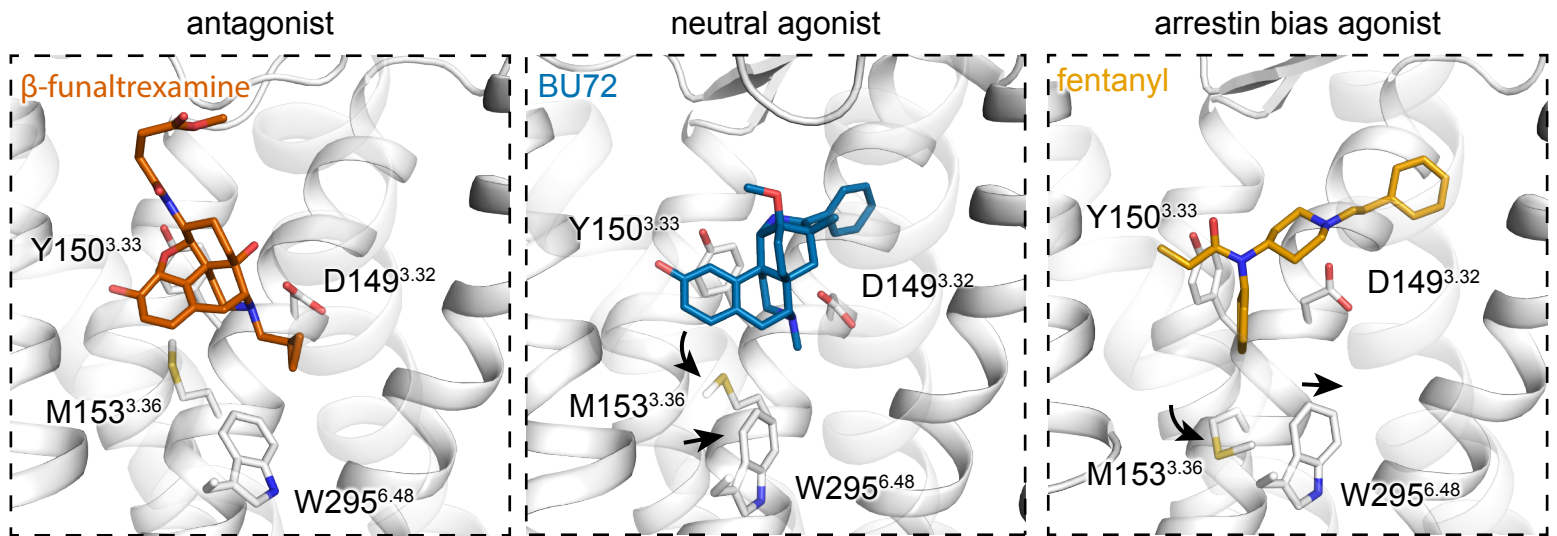

Source: https://www.biorxiv.org/content/biorxiv/early/2019/09/16/771246.full.pdf
